1           **Simultaneous adjustments of major mitochondrial pathways through redox**  
2           **regulation of dihydrolipoamide dehydrogenase (mtLPD1)**

3 Stefan Timm<sup>1\*</sup>, Nicole Klaas<sup>1</sup>, Janice Niemann<sup>1</sup>, Kathrin Jahnke<sup>1</sup>, Saleh Alseekh<sup>2</sup>, Youjun  
4 Zhang<sup>2,3</sup>, Paulo V.L. Souza<sup>4</sup>, Liang-Yu Hou<sup>5</sup>, Peter Geigenberger<sup>5</sup>, Danilo M. Daloso<sup>4</sup>, Alisdair R.  
5 Fernie<sup>2,3</sup>, Martin Hagemann<sup>1</sup>

6  
7 <sup>1</sup>University of Rostock, Plant Physiology Department, Albert-Einstein-Straße 3, D-18059  
8 Rostock, Germany

9 <sup>2</sup>Max Planck Institute of Molecular Plant Physiology, Am Mühlenberg 1, D-14476 Golm,  
10 Germany

11 <sup>3</sup>Center of Plant System Biology and Biotechnology, 4000 Plovdiv, Bulgaria

12 <sup>4</sup>LabPlant, Departamento de Bioquímica e Biologia Molecular, Universidade Federal do Ceará,  
13 Fortaleza 60451-970, Brazil

14 <sup>5</sup>Ludwig-Maximilians-University Munich, Department Biology I, 82152 Planegg-Martinsried,  
15 Germany

16

17 **\*Correspondence to:**       [stefan.timm@uni-rostock.de](mailto:stefan.timm@uni-rostock.de)

18 **One-sentence summary:** Redox regulation of mitochondrial dihydrolipoamide  
19 dehydrogenase (mtLPD1) simultaneously modulates photorespiration, the tricarboxylic acid  
20 (TCA)-cycle and branched chain amino acid (BCAA) degradation in response to rapid  
21 environmental changes.

22 **§Footnotes:**

23 **Author Contributions:** S.T. conceived the project. S.T., and D.M.D., designed the research.  
24 S.T., P.G., D.M.D., and A.R.F. supervised the project. S.T., N.K., J.N., K.J., S.A., Y.Z., P.V.L.S.,  
25 L-Y.H., and D.M.D. performed the research and analyzed data. A.R.F. and M.H. provided  
26 experimental equipment and tools. S.T. wrote the article, with additions and revisions from P.G.,  
27 D.M.D., A.R.F. and M.H. All authors have read and approved the final version of the manuscript.

28 **Present address of L-Y.H.:** Academia Sinica, Institute of Plant and Microbial Biology, 11529,  
29 Taipei, Taiwan

## 30 **Abstract**

31 Thioredoxins (TRX) are pivotal for the redox regulation of enzyme activities to adjust metabolic  
32 fluxes towards environmental changes. Previous reports demonstrated TRX *o1* and *h2* impact  
33 on mitochondrial metabolism including photorespiration and the tricarboxylic acid (TCA) cycle.  
34 Here, we aimed to unravel potential specificities between regulation modes of both TRXs,  
35 especially under conditions with short-term changes in photorespiration. Therefore, short-term  
36 metabolite responses of single *TRX* mutants were analyzed after exposure to altered CO<sub>2</sub>/O<sub>2</sub>  
37 ratios during darkness and illumination. This approach was complemented by comprehensive  
38 characterization of multiple *Arabidopsis* mutants lacking either one or both *TRX* in the wild-type  
39 *Arabidopsis* or the glycine decarboxylase (GDC) T-protein knock down line (*gldt1*). The results  
40 provided evidence for additive effects of combined TRX *o1* and *h2* deficiency to suppress  
41 growth, photosynthesis and mitochondrial metabolism. Quantification of pyrimidine nucleotides  
42 in conjunction with metabolite and <sup>13</sup>C-labelling approaches revealed a rather uniform impact on  
43 mitochondrial dihydrolipoamide dehydrogenase (mtLPD1) dependent pathways. Biochemical  
44 analysis of recombinant mtLPD1 demonstrated its inhibition by NADH, pointing at an additional  
45 measure to fine-tune its *in vivo* activity. Collectively, we propose that TRX *o1* and *h2* contribute  
46 to the communication of altered subcellular redox-states through direct and indirect regulation of  
47 mtLPD1. This regulation module might represent a common intercept for simultaneous  
48 adjustments in the operation of photorespiration, the TCA-cycle and the degradation of branched  
49 chain amino acids.

## 50 **Introduction**

51 Thioredoxins (TRX) catalyze reduction-oxidation (redox) reactions via reversible thiol-disulfide  
52 exchanges in numerous enzymes of primary metabolism in many organisms. This  
53 posttranslational modification (PTM) is key to maintain fast and flexible adjustments of  
54 metabolism towards fluctuating conditions within seconds to hours. The possibility to allow  
55 efficient acclimation of metabolism is of particular significance for plants as they are sessile and  
56 unable to actively escape from rapid and harsh environmental changes that frequently occur in  
57 nature. The latter have been proposed to lead to strong alterations in plant subcellular redox  
58 states, which requires redox regulation at multiple levels (Zaffagnini et al., 2019). Regulation via  
59 TRX is mainly adjusting enzymatic activities and, in turn, metabolic fluxes. However, this

60 regulatory principle is of broad importance also for many fundamental processes in plants  
61 including light acclimation, stress tolerance, gene expression, protein transport and processing,  
62 autophagy, seed germination and plant development (e.g. Balmer et al., 2004; Buchanan, 2016;  
63 Geigenberger et al., 2017; Lee et al., 2021; Møller et al., 2020; Nietzel et al., 2020).

64 Within the last years it was demonstrated that plants possess a complex TRX network.  
65 For example, *Arabidopsis thaliana* L. (*Arabidopsis*) contains seven different TRX families,  
66 encoded by at least 20 different genes, distributed among various subcellular compartments.  
67 The best studied TRX are isoforms belonging to *m*, *f*, *x*, *y* and *z* types that exclusively localize to  
68 the chloroplast. Within this compartment, they are involved in various processes including the  
69 regulation of light acclimation, photosynthesis, starch metabolism, as well as carbon and  
70 nitrogen utilization (e.g., Ancín et al., 2021; Buchanan, 2016; Geigenberger et al., 2017;  
71 Nikkanen et al., 2017; Thormählen et al., 2013; 2017). Important regulatory roles have also been  
72 shown for extra-plastidal TRX belonging to the *o* and *h* types. Whilst TRX *o* isoforms are  
73 restricted to mitochondria and, perhaps, the nucleus, the TRX *h* isoforms can be found in diverse  
74 subcellular compartments (Delorme-Hinoux et al., 2016, Buchanan, 2017; Lee et al., 2021).  
75 Daloso et al (2015) demonstrated that TRX *o1* is involved in the regulation of the TCA-cycle  
76 through controlling the activity of succinate dehydrogenase (SDH) and fumarase (FUM), thereby  
77 contributing to the light-inactivation of respiration and the establishment of the different flux-  
78 modes in the TCA-cycle (Sweetlove et al., 2010; Daloso et al., 2015; daFonseica-Pereira et al.,  
79 2020). Moreover, TRX *o1* was discussed to contribute to regulation of mitochondrial alternative  
80 oxidase (AOX) under certain conditions but its significance *in vivo* remains controversial (Florez-  
81 Sarasa et al., 2019; Møller et al., 2020). Cumulative evidence, however, exists for TRX *o1*  
82 mediated regulation of photorespiration. It was demonstrated that TRX *o1* deficiency affects  
83 mitochondrial photorespiratory metabolism in response to shifts from high-to-low CO<sub>2</sub> and,  
84 perhaps, light-induction of photosynthesis (Reinholdt et al., 2019a; 2019b). In addition,  
85 biochemical analysis revealed the direct involvement of TRX *o1* in the redox regulation of  
86 mitochondrial dihydrolipoamide dehydrogenase (mtLPD1). It is worth mentioning that similar  
87 observations were reported with TRX *h2*, a member of the largest TRX family in *Arabidopsis*  
88 (daFonseica-Pereira et al., 2020). Although a few reports suggested mitochondrial localization of  
89 TRX *h2*, a recent study revealed its localization to the microsomal fraction (Hou et al., 2021).  
90 Nevertheless, there is experimental evidence that TRX *h2* deficiency impacts mitochondrial  
91 photorespiratory metabolism, while the underlying mechanism remained elusive to date  
92 (daFonseica-Pereira et al., 2020; 2021). It seems tempting to hypothesize that TRX *h2* operation  
93 also contributes to the mitochondrial redox-homeostasis. A likely central target could be glycine

94 decarboxylase (GDC), because TRX *h2* mutant lines showed altered photorespiration under  
95 sudden environmental changes. This assumption is supported by biochemical analysis showing  
96 changed GDC activities under redox-changes. In detail, GDC activity as a whole was shown to  
97 be inhibited at high NADH/NAD<sup>+</sup> ratios, whilst its activity can be modulated also through redox  
98 regulation of the single GDC proteins P and mtLPD1 (Bourguignon et al., 1988; Hasse et al.,  
99 2013; Reinholdt et al., 2019a, daFonseica-Pereira et al., 2020).

100 The findings that TRX *o1* and *h2* are able to redox regulate mtLPD1 eventually has  
101 consequences beyond photorespiration, since mtLPD1 is not restricted to GDC. Indeed, the  
102 protein is also shared with two TCA-cycle complexes, namely, 2-oxoglutarate dehydrogenase  
103 (OGDC) and pyruvate dehydrogenase (PDC), as well as the branched chain 2-oxoacid  
104 dehydrogenase complex (BCKDC), involved in the catabolism of branched chain amino acids  
105 (BCAAs) (Bourguignon et al., 1988; Millar et al., 1998; 1999). Consequently, mtLPD1 might be a  
106 prime candidate for the simultaneous regulation of three major branches of mitochondrial  
107 metabolism towards environmental changes as suggested recently (Timm and Hagemann,  
108 2020). To test this hypothesis, we compared the single TRX *o1* (*trxo1-1*) and *h2* (*trxh2-2*)  
109 mutants with double and triple Arabidopsis mutants lacking TRX *o1* and *h2* in the wild-type or in  
110 the *gldt1-1* mutant background (Engel et al., 2008). The mutant *gldt1* was included, because it  
111 has a moderate reduction in the photorespiratory flux through a knock down in the GDC T-  
112 protein expression, decreasing overall GDC activity (Timm et al., 2018). The subsequent  
113 analyses focused on photorespiration, the TCA-cycle and the degradation of BCAAs.  
114 Additionally, we also compared short-term GDC operation in response to onset of illumination  
115 with active and suppressed photorespiration using metabolomics and an <sup>13</sup>C-isotope labelling  
116 experiment. Finally, the mutant analysis was complemented by continuative biochemical  
117 analysis of recombinant mtLPD1. The results obtained point to mtLPD1 as a potential master  
118 switch translating alterations in the mitochondrial redox-state to modulate flux through  
119 photorespiration, the TCA-cycle and the degradation of BCAAs in response to rapid  
120 environmental changes involving TRX *o1* and *h2*.

## 121 **Results**

### 122 **Targeted analysis of mtLPD1-dependent pathways in single TRX mutants exposed to** 123 **short-term environmental changes**

124 Previous reports showed deletion of TRX *o1* and *h2* affect the performance of mitochondrial  
125 pathways including photorespiration (Reinholdt et al., 2019a; daFonseica-Pereira et al., 2020)

126 the TCA-cycle (Daloso et al., 2015) and, perhaps, BCAAs degradation (Timm and Hagemann,  
127 2020). Hence, single *TRX o1* or *h2* deficiency mutants were initially analyzed whether they show  
128 similar or specific metabolic responses among the three mtLPD1-dependent mitochondrial  
129 pathways, particularly under conditions with short-term changes in photorespiration. To this end,  
130 the wild type was grown next to the single *TRX* mutants (*trxo1-1* and *trxh2-2*) under standard  
131 conditions and then exposed for 15 min to altered CO<sub>2</sub>/O<sub>2</sub> ratios in the absence and presence of  
132 light (Fig. 1A). Subsequently, selected metabolite amounts were quantified through liquid  
133 chromatography coupled to tandem mass spectrometry (LC-MS/MS). Glycine, the  
134 photorespiratory intermediate metabolized by the GDC in mitochondria, showed low  
135 concentrations under conditions with no or suppressed photorespiration. Furthermore, glycine  
136 was largely invariant among the wild type and the *TRX* single mutants. Under photorespiratory  
137 conditions, however, glycine is generally present in higher amounts in all genotypes.  
138 Significantly higher glycine accumulation was observed in both *TRX* mutants compared to the  
139 wild type at enhanced photorespiration, i.e. at 21 and 40% O<sub>2</sub> and 500 μmol m<sup>-2</sup> s<sup>-1</sup> light (Fig.  
140 1B). Serine concentrations are almost similar in all conditions and do not show much variations  
141 between the wild type and the *TRX* mutants except for a slight but significant increase in  
142 darkness at 3% O<sub>2</sub> (Fig. 1B). The BCAAs pattern is similar to that of glycine. Almost no  
143 significant changes appeared in the absence or with suppressed photorespiration (except  
144 decreases in leucine in *trxo1* and *trxh2* and isoleucine in *trxo1*) among the genotypes (Fig. 1C).  
145 After induction of photorespiration all three BCAAs accumulated in the *TRX* mutants at 150 μmol  
146 m<sup>-2</sup> s<sup>-1</sup> light in the presence of 21 and 40% O<sub>2</sub>. These changes were more distinct at the higher  
147 light intensity of 500 μmol m<sup>-2</sup> s<sup>-1</sup> in conjunction with 21 and 40% O<sub>2</sub> (Fig. 1C).

148 A more diverse picture was observed among the TCA-cycle intermediates. In the  
149 absence of photorespiration, a consistent pattern was observed in both *TRX* mutants for most  
150 intermediates including pyruvate, citrate, aconitate, 2-oxoglutarate and succinate. Almost all of  
151 these intermediates were elevated at 3% O<sub>2</sub> (except succinate) and decreased at 21 and 40%  
152 O<sub>2</sub> (except pyruvate and 2-oxoglutarate). Fumarate and malate, however, were largely invariant  
153 and only elevated in *trxo1* at 40% O<sub>2</sub> (Fig. 2). In response to illumination, with suppressed  
154 photorespiration, fewer changes emerged. Almost no systematic changes were found in  
155 pyruvate, 2-oxoglutarate, fumarate and malate. Increases were seen in succinate at 3% O<sub>2</sub> (both  
156 lines), citrate at 3% O<sub>2</sub> (*trxh2*) and 21% O<sub>2</sub> (both lines) and aconitate at all O<sub>2</sub> concentrations and  
157 both *TRX* mutants (except *trxo1* at 3%). Under conditions with active photorespiration and  
158 standard growth light, pyruvate and citrate remained unaltered among all genotypes. Most of the  
159 other intermediates did show only few, non-systematic changes. Interestingly, aconitate and

160 fumarate displayed a somewhat reversed accumulation pattern between *trxo1* and *trxh2*. Finally,  
161 in response to a higher light intensity both *TRX* mutants significantly accumulated TCA-cycle  
162 intermediates at one or both higher O<sub>2</sub> concentrations including pyruvate, citrate, aconitate,  
163 succinate fumarate and malate. A slight decrease of 2-oxoglutarate was seen in *trxh2* at 40% O<sub>2</sub>  
164 (Fig. 2).

165 Collectively, single knock outs of the *TRX o1* and *h2* have similar effects on  
166 photorespiratory glycine and BCAAs under conditions of elevated photorespiration, whereas the  
167 effects on TCA cycle intermediates were less homogenous.

### 168 **Combined deletion of *TRX o1* and *h2* additively impairs photosynthetic-photorespiratory** 169 **gas exchange**

170 Single mutants defective in either, *TRX o1* or *h2*, respectively, do not display major growth  
171 retardations or impairments of photosynthetic CO<sub>2</sub> assimilation if grown under standard  
172 conditions with shorter photoperiods. However, an increase in the stoichiometry of  
173 photorespiratory CO<sub>2</sub> release was seen in both single *TRX* mutants during oxygen-dependent  
174 gas exchange measurements (Reinholdt et al., 2019a; daFonseica-Pereira et al., 2020). To  
175 answer the question, if *TRX o1* and *h2* are redundant or fulfil specific roles, a mutant bearing a  
176 combined deletion of *TRX o1* and *h2* was generated (*trxo1h2*; Hou et al., 2021) and specifically  
177 analyzed regarding photorespiration as well as mitochondrial metabolism during this study. For  
178 this purpose, *trxo1h2* was grown next to the wild type in ambient air (400 ppm CO<sub>2</sub>) to growth  
179 stage 5.1 (Boyes et al., 2001) and used for gas exchange measurements. Whilst single *trxo1*  
180 and *trxh2* mutants displayed wild-type-like net CO<sub>2</sub> uptake rates (*A*) in normal air (Reinholdt et  
181 al., 2019a; daFonseica-Pereira et al., 2020), the double mutant already showed a significant  
182 decrease of *A* to about 15% under these conditions (Fig. 3A). At elevated photorespiratory  
183 pressure (50% O<sub>2</sub>), this decrease was further pronounced (up to ~19%), resulting in an oxygen  
184 inhibition of *A* to about ~32% (Fig. 3B). In contrast, if the photorespiratory pressure was reduced  
185 (3% O<sub>2</sub> or 2000 ppm CO<sub>2</sub>), *A* values were statistically invariant between the double mutant and  
186 the control (Fig. 3A, 3C). Consistent observations were made regarding the CO<sub>2</sub> compensation  
187 point ( $\Gamma$ ), i.e. invariant among the genotypes at 3% O<sub>2</sub>, but gradually decreased in the double  
188 mutant at 21% and 50% O<sub>2</sub> compared to wild type (Fig. 3D). These changes lead to an increase  
189 of the slope ( $\gamma$ ) from the estimated  $\Gamma$ -versus-oxygen response lines by about ~28% (Fig. 3E),  
190 indicating a higher fraction of CO<sub>2</sub> released from photorespiration. Furthermore, the

191 determination of *A* at increasing light intensities revealed a stronger reduction of photosynthetic  
192 CO<sub>2</sub> uptake rates in *trxo1h2* compared to the wild type most notable at high light (Fig. 3F).

193 The above findings indicate that the TRX *o1* and *h2* are not necessarily redundant but  
194 rather have additive impact on photosynthetic gas exchange. The suggested additive impairment  
195 of photorespiration in *trxo1h2*, i.e. increased O<sub>2</sub> sensitivity, is provided by the phenotypic  
196 alterations of the *trxo1h2* double mutant under conditions requiring higher photorespiratory  
197 capacities. Following growth under a 10/14 h day-/night-cycle in HC and a transfer to LC  
198 combined with long day conditions, *trxo1h2* displayed strongly retarded growth compared to all  
199 other genotypes and to continuous growth in shorter photoperiods. In contrast, the single *trxo1*  
200 or the *trxh2* single deletions are visually indistinguishable from the wild type (Supp. Fig. S1).  
201 Furthermore, onset of flowering was comparable between the wild type and the single mutants;  
202 however, it was delayed to about 10-to-14 days in *trxo1h2* under this growth condition.

### 203 **Distinct accumulation of diagnostic photorespiratory intermediates in *trxo1h2* at high O<sub>2</sub>**

204 Next, the reduced photorespiratory capacity in *trxo1h2* was verified on the metabolite level. To  
205 this end, three diagnostic photorespiratory intermediates were quantified via LC-MS/MS in  
206 response to short-term high O<sub>2</sub> and light treatments to stimulate RuBP oxygenation and  
207 subsequent photorespiration. 2-Phosphoglycolate (2PG) was selected as a proxy for ribulose-  
208 1,5-bisphosphate (RuBP) oxygenation, whilst glycine and serine served as indicators for GDC  
209 activity in mitochondria. As expected, the wild type displayed increased amounts of 2PG and  
210 glycine after exposure to 40% O<sub>2</sub> for 15 min at 150 μmol m<sup>-2</sup> s<sup>-1</sup> light (Fig. 4). This response was  
211 further amplified with a simultaneous increase in the light intensity to 500 μmol m<sup>-2</sup> s<sup>-1</sup>. Despite  
212 serine amounts were largely invariant in all conditions, the glycine-to-serine ratio increased in  
213 response to higher O<sub>2</sub> and light quantities (Fig. 4). The *trxo1h2* mutant showed elevated 2PG  
214 (+87%) and serine (+30%) but not glycine contents under control conditions compared to wild  
215 type. However, stimulation of RuBP oxygenation and photorespiration through an increased O<sub>2</sub>  
216 concentration (40%) caused much higher accumulation of 2PG (+105%) and glycine (+172%) in  
217 the *trxo1h2* double mutant than in wild type. This effect was further amplified with a higher light  
218 intensity (Fig. 4). Despite serine appeared wild-type-like at both light intensities and elevated O<sub>2</sub>,  
219 the alterations in glycine caused a significant increase in the glycine-to-serine ratio in *trxo1h2*  
220 (Fig. 4).

## 221 **Isolation, phenotype and PSII quantum yield of multiple *TRX/GDC-T* mutants**

222 We previously demonstrated that deletion of *TRX o1* in the *gldt1* mutant knockdown background  
223 strengthened the phenotypic and physiological alterations of both single mutants (Reinholdt et  
224 al., 2019a). Therefore, the *gldt1* mutant was used to generate *TRX h2* deficiency that permits the  
225 comparison of the *trxh2xgldt1* and the *trxo1xgldt1* double mutants. Furthermore, the triple  
226 mutant, simultaneously lacking *TRX o1* and *h2* in the *gldt1* knockdown background, was  
227 obtained to clarify if additive effects occur through absence of both TRX. To achieve these goals,  
228 the *trxo1xgldt1* double mutant (Reinholdt et al., 2019a) was crossed with the single *trxh2-2*  
229 mutant allele. After verification of the triple heterozygous T1-intermediate, the T2-generation was  
230 grown under high CO<sub>2</sub> conditions (HC, 3000 ppm CO<sub>2</sub>) to ensure isolation of mutants strongly  
231 impaired in photorespiration. Indeed, this procedure led to isolation of a *trxh2xgldt1* double and a  
232 *trxo1xgldt1xtrxh2* (triple) mutant (Supp. Fig. S2).

233 The full mutant set was analyzed regarding selected phenotypic and photosynthetic  
234 parameters. In detail, the growth and PS efficiency ( $F_v/F_m$ ) of the genotypes was compared  
235 when grown in either condition with suppressed photorespiration (HC - high CO<sub>2</sub>, 3000 ppm) or  
236 active photorespiration (LC – low CO<sub>2</sub>, ambient air, 390 ppm). The *adg1-1* mutant, deficient in  
237 the small subunit of ADP-glucose pyrophosphorylase (Lin et al., 1988), was included as an  
238 additional control, since it displays visible growth retardation under the conditions used which  
239 cannot be complemented by elevated CO<sub>2</sub>. All genotypes, except for *adg1*, grew similar to the  
240 wild type in HC (Fig. 5A). This visual impression was corroborated by invariant t rosette  
241 diameters and total leaf-counts (again with the exception of *adg1*) (Table 1). Similarly,  
242 chlorophyll (Chl) a fluorescence images and the  $F_v/F_m$  values of the genotypes did not show  
243 major differences. Exceptionally, *adg1* displayed a slight reduction in the maximum quantum  
244 yield of PSII (Fig. 5A, Table 1). By contrast, distinct changes in growth and Chl a fluorescence  
245 emerged during growth in ambient air. Visually, there were no major growth changes between  
246 the wild type and the single *TRX* mutants (Fig. 5B). However, the *TRX* double mutant was  
247 significantly reduced in its diameter and leaf-number in ambient air, whilst *gldt1* also showed the  
248 expected reduction in growth (Fig. 5B, Table 1). More obvious, both double mutants in the *gldt1*  
249 background were considerably more retarded in growth compared to *gldt1*, even including  
250 yellowish bleaching leaves. Interestingly, the effects were somewhat stronger in the *trxh2xgldt1*  
251 compared to the *trxo1xgldt1*. Nevertheless, all alterations were further amplified in the triple  
252 mutant. This statement agreed well with reduced  $F_v/F_m$ , rosette diameters and the total leaf-  
253 count in air (Fig. 5B, Table 1).



254 Collectively, the phenotypes of the different *TRX* mutations in the *gldt1* background  
255 support the notion that deletion of both *TRX* caused additional effects under ambient conditions  
256 in *Arabidopsis*, at least to some extent.

### 257 **The impact of multiple *TRX/GDCT* mutations on photorespiratory GDC**

258 Targeted metabolite quantification of mtLPD1-dependent pathways was next performed through  
259 LC-MS analysis in the full mutant set. To distinguish between metabolic consequences resulting  
260 either from impaired regulation of photorespiration or deregulated TCA-cycle, and between  
261 short- and long-term acclimation effects, plant material at growth stage 5.1 (Boyes et al., 2001)  
262 was analyzed under three different conditions: **(i)** 9 h illumination (end of day - EoD) in HC, **(ii)** 9  
263 h illumination (EoD) with active photorespiration following a shift to ambient air (LC-shift) and **(iii)**  
264 9 h illumination (EoD) with active photorespiration following continuous growth in LC.

265 Primarily, we aimed to gain insights on *in planta* GDC performance. In HC, the single and  
266 double *TRX* mutants displayed largely unaltered glycine and serine amounts, whilst *gldt1*  
267 showed a 2-fold increase in glycine and a slight elevation in serine. However, *trxo1h2* and the  
268 triple mutant showed a further, but compared to strong photorespiratory mutants (e.g. Timm et  
269 al., 2012; Eisenhut et al., 2017) still moderate, elevation in glycine (significant in the triple  
270 mutant) under HC conditions. Serine remained almost invariant except for a significant increase  
271 in the triple mutant comparable to that of *gldt1* (Fig. 6A1, B1). Upon a shift from HC to LC (i.e.  
272 short-term acclimated to ambient air), all mutants accumulated more glycine. The increase was  
273 moderate, but similar among the single and double *TRX* mutants and expectedly highest in  
274 *gldt1*. Glycine accumulated to higher levels in both *TRX/GLDT* double mutants compared to  
275 *gldt1* and tended to be higher also in the triple mutant. Whilst serine was mostly unchanged in  
276 *trxo1*, *trxh2* and *trxo1h2*, it followed the opposite trend as glycine in the other mutants.  
277 Decreased serine amounts were observed in the single *gldt1*, the double and triple *TRX/GDCT*  
278 mutants compared to the wild type. Notably, the drop was significantly stronger in *trxo1xgldt1*  
279 and *trxh2xgldt1* compared to *gldt1* and even pronounced in the triple mutant in comparison with  
280 both double mutants (Fig. 6A2, B2). In leaves harvested from plants continuously grown in LC  
281 (i.e. long-term acclimated to ambient air) a more diverse picture appeared. The lines *trxh2* and  
282 *trxo1h2* were significantly decreased in glycine, whereas *trxo1* showed wild-type-like amounts  
283 (Fig 6 A3). By contrast, *gldt1*, *trxo1xgldt1* and *trxh2xgldt1* (significantly higher as in *gldt1*) and  
284 the corresponding triple mutant (significantly higher compared to both *TRX/GDCT* double  
285 mutants) displayed strongly increased glycine amounts. In contrast, following a transfer in LC

286 minor alterations in serine (decrease in *trxo1*, elevated in *trxo1h2*) became visible in plants  
287 grown in normal air (Fig. 6 B3).

### 288 **Impact of multiple *TRX/GLDCT* mutations on TCA cycle and BCAAs degradation**

289 Next, we compared metabolic changes in photorespiration intermediates with both other  
290 pathways relying on the operation of mtLPD1 containing multienzymes, i.e. the TCA-cycle (PDH,  
291 OGDC) and BCAAs degradation (BCKDC). In HC, some TCA-cycle intermediates (citrate,  
292 aconitate and 2-oxoglutarate) were decreased in *trxo1*, with minor changes in *trxh2* (decreased  
293 aconitate). By contrast, succinate and fumarate were significantly increased in *trxo1*, with no  
294 changes in malate and the associated metabolite GABA. In *gldt1* we observed a decrease  
295 exclusively in 2-oxoglutarate (Supp. Tab. S1). Among the BCAAs we found only minor changes  
296 such as higher valine and isoleucine in *gldt1*. In the multiple mutants, *trxo1h2* showed the fewest  
297 changes including a decrease in 2-oxoglutarate and elevated leucine. All lines combining a *TRX*  
298 mutation with the *GLDT* knockdown showed the strongest, but not always consistent changes. In  
299 *trxo1xgldt1* we found an increase in the TCA-cycle intermediates pyruvate, succinate and  
300 fumarate. The *trxh2xgldt1* mutant showed a different response given only citrate was  
301 significantly lower. Finally, and in general, the metabolite alterations in the triple mutant in HC  
302 were almost comparable to that of *trxo1xgldt1* (Supp. Tab. S1).

303 Following induction of photorespiration upon a shift from HC-to-LC, the metabolic  
304 response of the single mutants regarding the TCA-cycle differed from that observed in HC. After  
305 9 h in air, we observed increased citrate and aconitate in *trxo1* and decreased pyruvate and  
306 citrate in *trxh2*. No significant changes occurred in either mutant in the levels of BCAAs. *Gldt1*  
307 showed a decrease in pyruvate and citrate and elevated 2-oxoglutarate and succinate. Similar to  
308 previous observations, impairment of the photorespiratory flux in *gldt1* caused accumulation of  
309 BCAAs (Supp. Tab. S2). Among the multiple mutants, the most interesting change was  
310 increased pyruvate in *trxo1h2* after HC-to-LC shift. Most of the other TCA-cycle metabolites (2-  
311 oxoglutarate, succinate and GABA) and all BCAA were decreased. The strongest alterations in  
312 both pathways were seen in the multiple mutants lacking either one or both *TRX* in the *gldt1*  
313 background. However, the responses were comparable between *trxo1xgldt1*, *trxh2xgldt1* and  
314 the triple mutant. Hence, all multiple mutants showed accumulation of almost all TCA-cycle  
315 intermediates and the BCAAs (Supp. Tab. S2) upon the HC-to-LC shift.

316 If plants were grown in ambient air (long-term acclimated to photorespiratory conditions),  
317 all single mutants showed a few more, partially consistent, changes. With regards to the TCA-

318 cycle, *trxh2* and *gldt1* displayed a similar metabolic signature (increases in most intermediates),  
319 whereas *trxo1* was only altered in succinate and malate (higher) and fumarate (lower). However,  
320 accumulation of BCAAs was only observed in *trxo1* and *gldt1*, while *trxh2* was similar to the wild  
321 type (Supp. Tab. S3). Interestingly, in *trxo1h2* some of the changes seen in the single mutants  
322 were not observed anymore. For example, fewer TCA-cycle intermediates were altered (except  
323 for pyruvate, succinate, fumarate and malate) and no change occurred in BCAAs. Finally, all  
324 multiple mutants in the *gldt1* background displayed a very similar metabolite accumulation  
325 pattern. All TCA-cycle intermediates (except fumarate) and BCAAs are present in significantly  
326 higher amounts compared to the wild type and, in most cases, also to the single mutants.  
327 Nevertheless, the triple mutant showed a few additive effects such as stronger changes in 2-  
328 oxoglutarate and fumarate compared to both *TRX/GLDT* double mutants (Supp. Tab. S3).

### 329 ***In planta* GDC operation following short-term induction of photosynthesis**

330 Our previous studies and the present work provided evidence that the absence of *TRX o1* and  
331 *h2* resulted in increased cellular glycine levels under certain environmental conditions, while  
332 biochemical analysis indicated that *TRX* directly regulates (inhibit) the enzymatic activation state  
333 of *mtLPD1 in vitro* (Reinholdt et al., 2019a; daFonseica-Pereira et al., 2020). The latter finding  
334 suggest that absences of both *TRX* proteins eventually facilitates *mtLPD* operation on a short-  
335 term and the glycine increase at later stages is due to an inhibition of overall GDC activity. In  
336 order to analyze whether increased metabolite pools originate from higher synthesis or slower  
337 consumption, a <sup>13</sup>C-isotope tracing experiment was performed to specifically profile the GDC  
338 reaction on a short-term. We restrict our analysis on *mtLPD1*-depending GDC, because the  
339 photorespiratory flux accounts for the major carbon flux in mitochondria upon illumination (e.g.  
340 Bauwe et al. 2012). First, the wild type, *gldt1*, the *trxo1h2* double and the corresponding triple  
341 mutant plants were grown in HC for 5 weeks. Subsequently, plant leaves were fed with <sup>13</sup>C-  
342 glycine in HC and LC to distinguish between conditions with suppressed or active  
343 photorespiration. The <sup>13</sup>C-glycine feeding was done for 30 and 60 min under illumination.  
344 Metabolites were isolated from frozen leaves and the incorporation of <sup>13</sup>C in glycine and serine  
345 followed by gas chromatography coupled to mass spectrometry (GC-MS) analysis.

346 Under control conditions (dark, HC), we detected no significant differences in the natural  
347 <sup>13</sup>C-glycine pattern among all genotypes. As expected, the fractional <sup>13</sup>C-enrichment following  
348 illumination, i.e. induction of photosynthesis, in glycine is significantly lower in all genotypes in  
349 HC compared to LC conditions (Fig. 7A). However, *trxo1h2* displayed slightly lower (significant

350 after 60 min)  $^{13}\text{C}$ -enrichments in glycine, whereas *gldt1* (significant after 30 and 60 min) and the  
351 triple (significant after 30 min) mutant showed higher  $^{13}\text{C}$ -glycine accumulation after onset of  
352 illumination at HC than wild type (Fig. 7A). The effects seen in HC became much more distinct  
353 with plants material incubated under LC conditions. LC-exposed wild type displayed an almost  
354 linear, much higher, increase in the  $^{13}\text{C}$ -enrichment in glycine compared to HC. Interestingly,  
355 *trxo1h2* also showed an increase in  $^{13}\text{C}$  in glycine but it was about half as much as observed in  
356 the wild type. Finally, *gldt1* and the triple mutant showed significantly elevated amounts of  $^{13}\text{C}$ -  
357 glycine compared to the control which culminated in an about 5-times higher fraction after 60  
358 min in both lines grown compared to wild type under LC conditions (Fig. 7A). If one considers  
359 serine, the product of the GDC and serine-hydroxymethyltransferase reaction,  $^{13}\text{C}$ -enrichment in  
360 the course of the experiment was also observed, but the enrichment rate was much lower  
361 compared to glycine (Fig. 7B). Moreover, less strong changes were seen in both conditions and  
362 among the genotypes after 60 min of  $^{13}\text{C}$ -glycine feeding, except a significant increase in the  
363  $^{13}\text{C}$ -enrichment in serine in *trxo1h2* after 60 min (Fig. 7B).

364 These findings suggest that GDC activity is increased in the *trxo1h2* double mutant (less  
365 glycine and enhanced serine label) on a short-term, whilst as expected it is already decreased  
366 under these conditions in the *gldt1* background.

### 367 **Pyridine nucleotide contents in multiple *TRX/GDCT* mutants under different conditions**

368 Regulation of redox-reactions in primary metabolism through the cellular TRX system mainly  
369 responds to the redox state of the cell, i.e. to changes in the relative reduction levels of pyridine  
370 nucleotides. Therefore, we next quantified the amounts of  $\text{NAD(H)}^+$  and  $\text{NADP(H)}^+$  in the  
371 mutants under the same conditions (HC, shifted to LC and grown in LC) and time points (EoD)  
372 used for the metabolite analyses above. In HC, we detected no significant changes in NADH,  
373  $\text{NAD}^+$  or the respective  $\text{NADH}/\text{NAD}^+$  ratios among the genotypes (Table 2, Supp. Tab. S4),  
374 which is consistent with the lower impact of *TRX* mutations on metabolism under this condition.  
375 Despite NADPH was largely unaltered in all mutants,  $\text{NADP}^+$  was significantly decreased in  
376 *trxh2*, *gldt1*, *trxo1h2*, *trxh2xgldt1* and the triple mutant. However, these changes translated to  
377 significantly altered  $\text{NADPH}/\text{NADP}^+$  ratios only in *gldt1* and *trxo1h2* (Table 2, Supp. Tab. S4).  
378 Upon the shift to LC, *trxo1xgldt1* was found to be increased in NADH whilst the  $\text{NADH}/\text{NAD}^+$   
379 ratio was higher in *trxh2*, *trxo1xgldt1* and the triple mutant compared to the wild type. With  
380 regards to the phosphorylated pyridine nucleotides only few changes were seen. This included  
381 *trxo1* among the single mutants (decreased NADPH and  $\text{NADPH}/\text{NADP}^+$  ratio) and the *trxo1h2*

382 double mutant (decreased NADPH and NADP<sup>+</sup>). All other mutants displayed values comparable  
383 to the wild type (Table 2, Supp. Tab. S5). Finally, if leaf-material was analyzed from plants  
384 continuously grown in LC, more systematic changes emerged. Despite NAD<sup>+</sup> was only  
385 decreased in *trxo1*, almost all other mutants (except *trxh2* and *trxo1xgldt1*) contained  
386 significantly lower amounts of NADH. These changes caused a noticeable reduction in the  
387 NADH/NAD<sup>+</sup> ratio in almost all of the analyzed genotypes, excluding *trxh2* (Table 2, Supp. Tab.  
388 S6). At one hand, NADPH tended to be increased in some of the multiple mutants, however,  
389 these changes were not significant compared to the control. On the other hand, all three single  
390 mutants and the *trxh2xgldt1* and the *trxo1h2* double mutants displayed decreased amounts of  
391 NADP<sup>+</sup>. All the alterations mentioned before ultimately caused a significant increase in the  
392 NADPH/NADP<sup>+</sup> ratio in *gldt1*, *trxh2xgldt1*, *trxo1h2* and the triple mutant (Table 2, Supp. Tab.  
393 S6).

394 Taken together, the absence of different TRX proteins had marked impact on the relative  
395 reduction of pyridine nucleotides. Especially, the response of the NADH/NAD<sup>+</sup> ratio is biphasic  
396 given it is mostly increased after short-term, but decreased, after long-term acclimation to  
397 photorespiratory conditions in most mutants.

### 398 **Plant mtLPD1 is inhibited by NADH**

399 TRX *o1* and *h2*, respectively, were shown to contribute to the regulation of the activation state of  
400 mtLPD1 *in vitro* and, perhaps, *in vivo* (Reinholdt et al., 2019a; daFonseica-Pereira et al., 2020).  
401 However, since TRX *h2* was reported to reside to the microsomal fraction rather than to  
402 mitochondria (Hou et al., 2021), the impact of TRX *h2* deficiency on mtLPD1 is likely indirect,  
403 presumably via modulation of the mitochondrial redox state. Interestingly, a study of *E. coli* LPD  
404 revealed its inhibition by NADH at physiological concentrations (Kim et al., 2008), making this  
405 molecule a prime candidate for further regulation of mtLPD1 in response to altered mitochondrial  
406 pathway fluxes, especially photorespiration. For this reason, and the changes observed in the  
407 NADH/NAD<sup>+</sup> ratio in the mutants (Table 2), recombinant mtLPD1 was obtained from *Pisum*  
408 *sativum* (*PsmtLPD1*) through heterologous expression and affinity purification and the activity  
409 tested with different NADH concentrations as potential inhibitor. The biochemical analysis  
410 revealed a considerable inhibition of *PsmtLPD1* by NADH (Fig. 8), whilst NADPH had no effect  
411 (data not shown). The inhibitor constant ( $K_i$ ) for NADH estimated from these measurements was  
412 ~ 66.11  $\mu$ M, which is comparable to the one recently reported for the recombinant LPD from the  
413 cyanobacterium *Synechocystis* sp. PCC 6803 (Wang et al., 2022).

## 414 Discussion

415 Redox regulation through TRXs is a fundamental mechanism to regulate a plethora of biological  
416 processes including metabolic fluxes, stress acclimation and tolerance or protein transport and  
417 processing (Balmer et al., 2004; Buchanan, 2016; Geigenberger et al., 2017; Møller et al., 2020).  
418 Next to their canonical chloroplastidial functions, recent research revealed TRXs also impact on  
419 mitochondrial processes. Hence, TRX *o1* and *h2* affect the operation of the TCA-cycle,  
420 photorespiration and, perhaps, the degradation of BCAAs (Daloso et al., 2015; Reinholdt et al.,  
421 2019; Møller et al., 2020; Timm and Hagemann, 2020; daFonseica-Pereira et al., 2020; 2021).  
422 Our main goal here was to test if TRX *o1* and *h2* mediated regulation of the three mitochondrial  
423 pathways could be explained through a regulatory mechanism involving a shared enzymatic  
424 activity/protein, namely mitochondrial dihydrolipoamide dehydrogenase (mtLPD1).

### 425 ***On the similarities and differences between the effects of deficiencies in TRX o1 and h2***

426 First, we aimed to find out if TRX *o1* and *h2* share a common or a specific response among the  
427 afore mentioned mtLPD1-dependet mitochondrial pathways. If they share a common response,  
428 we would expect similar metabolite patterns with both *TRX* single mutants. To prove this  
429 hypothesis, we designed experiments to explicitly induce short-term environmental fluctuations  
430 through triggering the necessity for optimal photorespiration (Fig. 1A). This was mainly  
431 performed since photorespiration represents the main mitochondrial flux in illuminated leaves  
432 (Bauwe et al., 2012; Lim et al., 2020) and deregulation of mtLPD1 might be best visible under  
433 these conditions. Indeed, we found a rather consistent metabolite accumulation pattern in the  
434 *trxo1* and *trxh2* single mutants among representative intermediates of photorespiration and  
435 BCAAs degradation. The pattern correlates with the rate of photorespiration since no significant  
436 change was seen in darkness or elevated CO<sub>2</sub> (Fig. 1B, C). The statement is in close agreement  
437 with the observed changes in levels of TCA-cycle intermediates since most metabolite patterns  
438 were comparable among the single mutants, with some specific variations (Fig. 2). Such  
439 discrepancies are, however, best explained by the different subcellular localization of both TRXs  
440 and the specific enzyme targets of TRX *o1* such as SDH and fumarase (Daloso et al., 2015; Hou  
441 et al., 2021). The direct impact on both enzymes was discussed to support the regulation of the  
442 different flux modes of the TCA-cycle and its inactivation in the light in addition to PDH regulation  
443 (Sweetlove et al., 2010; Araújo et al., 2011; Daloso et al., 2015; Lima et al., 2021). Interestingly,  
444 the latter statement is further supported by our metabolite analysis since pyruvate significantly  
445 accumulates in both TRX single mutants on a short-term (Fig. 2). Hence, these experiments

446 augment our supposition that TRX *o1* and *h2* might signal through a similar regulatory  
447 mechanism.

448 ***Are there additive effects through lack of TRX o1 and h2 on mitochondrial functions?***

449 The next question we tackled was if combined deficiency of TRX *o1* and *h2* has additive effects  
450 on mitochondrial functions. This was of interest because of the high redundancy in the regulation  
451 circuits involving TRX and glutaredoxins (Reichheldt et al., 2005). Indeed, the double *trxo1h2*  
452 mutant (Hou et al., 2021) showed significantly stronger impairment of the photosynthetic-  
453 photorespiratory gas exchange compared to single mutants (Fig. 3; Reinholdt et al., 2019;  
454 daFonseica-Pereira et al., 2020). Especially the increase in  $\gamma$ , a common classic diagnostic  
455 parameter for impaired photorespiration, was significantly elevated (~10% higher) compared to  
456 the single deletions. The responses were comparable to studies with other intermediate  
457 photorespiratory mutants (Timm et al., 2011; Cousins et al., 2011; Timm and Bauwe, 2013) and,  
458 thus, corroborated the photorespiration defect. Another line of evidence arose from the growth  
459 and metabolite analysis following short-term environmental perturbation. The *trxo1h2* double  
460 mutant showed clear signs of increased O<sub>2</sub>-sensitivity on the phenotypic level (Fig. 5B; Supp.  
461 Fig. 1) and a stronger slowdown of the photorespiratory metabolite conversion (Fig. 4).  
462 Compared to the single mutants that also accumulated glycine (Fig. 1B), deletion of both TRX  
463 significantly exacerbated these changes (Fig. 4). Interestingly, the GDC impairment did not  
464 result in major changes in serine, suggesting that a potential depletion can be prevented on  
465 the short-term potentially via the operation of other serine biosynthetic routes (Ros et al., 2014).  
466 Collectively, these results corroborated additive impairment of photorespiration in *trxo1h2*,  
467 presumably GDC. This assumption could be further supplemented with mutants exhibiting  
468 boosted GDC impairment through single and double TRX deficiency in the *gldt1* mutant  
469 background (Timm et al., 2018). In comparison with the *trxo1xgldt1* double mutant analyzed  
470 before (Reinholdt et al., 2019a), growth of *trxh2xgldt1* was similarly impaired. Notably,  
471 simultaneous deletion of TRX *o1* and *h2* in *gldt1* (triple mutant) caused significantly stronger  
472 symptoms (Table 1, Fig. 5A). However, all effects were mainly caused through a  
473 photorespiration defect given most alterations normalized in HC-grown plants, suppressing  
474 photorespiration (Table 1, Fig. 5B).

## 475 **Metabolic responses of mtLPD1-dependent pathways in multiple mutants**

476 The above results pointed to additive phenotypic and physiological responses through lack of  
477 both *TRXs* in the wild type and the *gldt1* mutant. Therefore, we expected a coincided impact also  
478 on mtLPD1-dependent pathways. Targeted metabolomics, revealed this holds true mostly for  
479 photorespiration and BCAAs degradation, but responses differ if plants were acclimated to  
480 ambient air on a short- or long-term. Similar to the growth effects, minor metabolic changes were  
481 seen in HC (Fig. 6, Supp. Table 1), which agrees with previous studies on *gldt1* and *trxo1xgldt1*  
482 (Timm et al., 2018; Reinholdt et al., 2019). Impaired photorespiratory GDC (glycine  
483 accumulation) largely mirrored the strength of the mutation in response to short-term ambient air  
484 acclimation (minor increases in the single mutants and *trxo1h2* < intermediate in *gldt1* < highest  
485 in *TRX* and *GLDT* double and triple mutants). However, the increases were rather similar among  
486 the multiple genotypes involving *TRX* and *GLDT1* mutations and additive effects in the triple  
487 mutant were only seen in serine on a short-term (Fig. 6A, 6B) or in glycine if plants were long-  
488 term acclimated to photorespiratory conditions (Fig. 6C). Serine alterations largely normalized if  
489 plants were grown in ambient air, again suggesting other serine biosynthesis pathways can  
490 compensate for a lowered GDC turnover (Ros et al., 2014). Similar to glycine, a general and  
491 comparable increase of all three BCAAs was seen in all genotypes harboring the *gldt1* mutation.  
492 The accumulation was strongest upon the HC-to-LC shift (short-term induction of  
493 photorespiration), including some additive effects in mutants with one or both *TRX* in *gldt1*  
494 compared to the *gldt1* (Supp. Table 2, 3). Impaired BCAAs degradation is shared with classic  
495 photorespiration mutants (Timm et al., 2012) and once more serves as evidence for impaired  
496 photorespiration and a metabolic connection of both processes mentioned earlier (Florian et al.,  
497 2013; Dellero et al., 2021). Interestingly, a clear variation of this response was a consistent  
498 decrease of all amino acids in *trxo1h2* after 9 h in air, but not in air grown plants, suggesting  
499 faster turnover on a short-term (Supp. Table 2, 3).

500 TCA-cycle intermediates did not always respond in a consistent manner across the  
501 mutants in comparison with photorespiration and BCAAs degradation. However, this finding is  
502 not surprising considering the different possible flux-modes (Sweetlove et al., 2014) and multiple  
503 regulation sites (Nunes-Nesi et al., 2013; Zhang et al., 2021), in the pathway. In addition to the  
504 mtLPD1-dependent enzyme complexes, namely PDH and OGDC (Millar et al., 1998; 1999),  
505 *TRX o1* can directly act on SDH and fumarase (deactivating) and the associated enzyme ATP-  
506 citrate lyase (ACL, activating) (Daloso et al., 2015). During illumination, and in HC, we expect  
507 either, very low rates of photorespiration and restricted carbon influx into the TCA-cycle because



508 of inhibited PDH through phosphorylation (Tcherkez et al., 2005; Zhang et al., 2021).  
509 Consequently, the impact of impaired photorespiration and the subsequent malfunctioning of  
510 mtLDP1-dependet regulation of enzyme complexes should be lower. In this regard, pyruvate  
511 accumulated only in the stronger mutants (*trxo1xgldt1-1* and triple). 2-Oxoglutarate was  
512 decreased in several genotypes (*trxo1*, *gldt1*, *trxo1xh2*, triple) which, perhaps, might be  
513 indicative for decreased flux through nitrogen assimilation. The clearest response on the TCA-  
514 cycle in HC was in *trxo1*, since intermediates of the oxidative branch (citrate, aconitate and 2-  
515 oxoglutarate) were lower, whilst some of the reductive branch (succinate and fumarate) tended  
516 to accumulate (Suppl. Table S1). Such behavior is congruent with the specific enzyme targets  
517 (Daloso et al., 2015). In conditions with active photorespiration, and in terms of a uniform  
518 response, all mutants with either one or two deleted *TRX* in the *gldt1* background displayed  
519 strongly impaired operation of the TCA-cycle. This is already seen after the LC-shift but was  
520 most distinct in air grown plants (Suppl. Table 2, 3). Due to the specific involvement of mtLPD1  
521 in PDH and OGDC, we mostly considered alterations in their substrates. Indeed, *gldt1* and most  
522 multiple mutants (except *trxo1h2*) showed the strongest responses in pyruvate and especially in  
523 2-oxoglutarate. This finding suggests that either, OGDC represents a central regulatory target or  
524 that nitrogen metabolism (i.e. ammonia refixation) is also affected through deletion of *TRX* and  
525 *GLDT*. The latter statement is congruent with many studies on photorespiratory mutants, either  
526 through perturbation of the photorespiratory nitrogen cycle and nitrogen metabolism in general  
527 (Bloom et al., 2010; Bloom, 2015; Timm et al., 2012; Dellero et al., 2015). Further work is  
528 needed in order to comprehensively characterize nitrogen metabolism in *TRX* deficient mutants  
529 with regards to elucidating the underlying regulatory mechanisms.

### 530 ***Redox regulation of mtLPD1 via TRX o1 and h2 allows a concerted regulation of multiple*** 531 ***mitochondrial pathways***

532 In terms of a consistent regulatory mechanism, our prime target for simultaneous effects on  
533 photorespiration, the TCA-cycle and BCAAs degradation was mtLPD1, as a shared enzyme  
534 (Bourguignon et al., 1988; Millar et al., 1998; 1999). This assumption originated from the  
535 previous finding that *TRX o1* and *h2* regulate mtLPD1 *in vitro* (Reinholdt et al., 2019;  
536 daFonseica-Pereira et al., 2020) and the additive negative effects on the double mutant  
537 observed during this study (e.g. Fig. 3-6). However, since only *TRX o1* localizes to the  
538 mitochondria (Laloi et al., 2001) and *TRX h2* resides to the microsomal fraction under normal  
539 conditions (Hou et al., 2021; Lee et al., 2021), direct regulation of the enzymatic activity can only  
540 occur through *TRX o1*. The central question then was how to connect the different

541 compartments with an underlying regulatory mechanism affecting multiple mitochondrial  
542 pathways. As another possibility we assumed parallel regulatory impact on the three pathways  
543 through mtLPD1 via a metabolic signal in response to changes in the redox states of subcellular  
544 compartments involving TRX *o1* and *h2*. The latter hypothesis is congruent with alterations in the  
545 pyrimidine nucleotide amounts observed previously (Reinholdt et al., 2019; daFonseica-Pereira  
546 et al., 2020) and the recent finding of considerable shifts in the redox couples of ascorbate and  
547 glutathione in the *TRX* mutants, especially *trxo1/h2* (Calderón et al., 2018; Hou et al., 2021).  
548 During this study we mainly found consistent biphasic changes in the NADH/NAD<sup>+</sup> ratio, i.e.  
549 significant increases after 9 h in ambient air and significant decreases in plants continuously  
550 grown in ambient air (Table 2, Suppl. Tables 4-6). This result might be indicative for a short-term  
551 overproduction of NADH through increased mtLPD1 activity, which became attenuated after  
552 long-term acclimation to photorespiratory conditions. This statement agrees well with the glycine  
553 accumulation under the different conditions (Fig. 1B, 4, 6 and 7A). Changes in the  
554 NADPH/NADP<sup>+</sup> ratio, which is more representative for chloroplastidal metabolism, were not so  
555 systematic and mainly restricted to mutants with the *gldt1* background. The most likely  
556 explanation for these changes is a slowdown of photosynthesis, i.e. the Calvin-Benson cycle,  
557 due to impaired photorespiratory metabolism and the resulting feedback inhibition through  
558 pathway intermediates. However, in light of the changes in the cellular NADH/NAD<sup>+</sup> ratios (Table  
559 2), and based on two previous studies showing inhibition of LPD from *E. coli* (Kim et al., 2008)  
560 and *Synechocystis* (Wang et al., 2022), we tested plant mtLPD1 towards its susceptibility for  
561 NADH. Pea mtLPD1 was taken since it was already available from previous work (Reinholdt et  
562 al., 2019a) and we failed to obtain soluble mtLPD1 from *Arabidopsis*. As shown in Fig. 8,  
563 PsmtLPD1 was inhibited by NADH at physiological concentrations, too. The estimated  $K_i$  was  
564 ~66.11  $\mu\text{M}$  – being similar in range to those reported for the *E. coli* and *Synechocystis* enzymes  
565 (Kim et al., 2008; Wang et al., 2022). The biphasic consequences of impaired TRX operation is  
566 also supported through the <sup>13</sup>C-labeling approach to profile *in planta* GDC activity following 30-  
567 to-60 minutes of illumination (Fig. 8). The *trxo1h2* double mutant was compared with *gldt1* in  
568 order to differentiate between effects mediated through redox changes with those directly  
569 occurring due to the impairment of photorespiration. Interestingly, *trxo1h2* was characterized by  
570 decreased fractional <sup>13</sup>C-enrichment into glycine compared to the wildtype, whilst *gldt1* and the  
571 triple mutant showed the anticipated elevated incorporation of the isotope (Fig. 8). From this  
572 comparison it seems reasonable to conclude that absence of both TRXs facilitates mtLPD1 and,  
573 in turn, overall GDC activity in the very short-term, leading to a massive overproduction of NADH  
574 after induction of photorespiration. Consequently, the mitochondrion becomes more reduced and

575 the NADH/NAD<sup>+</sup> ratio rises. Interestingly, such a scenario would ultimately inhibit GDC activity  
576 as reported previously (Bourguignon et al., 1988) and is likely to explain the high glycine  
577 accumulation seen in the multiple mutants (Fig. 6). Finally, this result, in conjunction with our  
578 findings presented here, would suggest the mtLDP1 regulation would not only have implication  
579 for photorespiratory GDC but also towards all other mtLDP1-dependent pathways.

## 580 **Material and methods**

### 581 **Plant material and growth**

582 In this study, *Arabidopsis thaliana* L. (*Arabidopsis*) ecotype Columbia.0 (Col.0) served as wild  
583 type reference. We used the following, previously isolated and characterized T-DNA insertional  
584 lines: *trxo1-1* (SALK 042792, Daloso et al., 2015), *trxh2-2* (SALK-079516, Laloi et al., 2004), the  
585 corresponding double mutant *trxo1h2* (Hou et al., 2021), *gldt1-1* (WiscDSLox 366A11-085, Timm  
586 et al., 2018) and the *trxo1-xgldt1-1* double mutant (Reinholdt et al., 2019a). Prior sowing on a  
587 mixture of soil and vermiculite (4:1), seeds were surface-sterilized with chloric acid.  
588 Subsequently, pots were incubated at 4°C for at least 2 days to break dormancy. All plants were  
589 grown under controlled environmental conditions as follows: 10 h day, 20°C/ 14 h night, 18°C,  
590 ~120  $\mu\text{mol photons m}^{-2} \text{ s}^{-1}$  light intensity, 70% relative humidity and with two different CO<sub>2</sub>  
591 concentrations (HC – high CO<sub>2</sub>, 3000 ppm and LC – low CO<sub>2</sub>, 390 ppm). Where specified in the  
592 text, plants were shifted from HC-to-LC to study the acclimation to altered CO<sub>2</sub> concentrations  
593 with otherwise equal conditions. Plants were regularly watered and fertilized weekly (0.2%  
594 Wuxal, Aglukon).

### 595 **Generation and verification of multiple *TRX* and *GLDT* mutants**

596 The *trxo1-xgldt1-1* T-DNA insertional line was crossed with *trxh2-2* to obtain a *trxh2-2xgldt1-1*  
597 double and a *trxo1-xgldt1-1trxh2-2* (triple) mutant. To verify the T-DNA insertions in the  
598 corresponding genes, leaf-DNA was isolated according to standard protocols and PCR-amplified  
599 (min at 94°C, 1 min at 58°C, 2 min at 72°C; 35 cycles) with primers specific for the left border  
600 (R497 [5'-AACGTCCGCAATGTGTTATTAAGTTGTC-3'] for WiscDsLox line, *gldt1-1*, P946 [5'-  
601 TGGTTCACGTAGTGGGCCATC-3'] for SALK 042792 line, *trxo1-1*, P959 [5'-  
602 ATTTTGCCGATTTTCGGAAC-3'] for SALK-079516 line, *trxh2-2*) and *AtGDC-T* (R490 [5'-  
603 ACAAAGTCATGGACGAAGGAGACACAC-3']), *TRX o1* (P945 [5'-  
604 CAACACGTTCTTTACTAGACG-3']) and *TRX h2* (P957 [5'-GATAATGGGAGGAGCTTTATC-  
605 3']) specific primers. The resulting fragments (*gldt1-1* 1859 bp, *trxo1-1* 1200 bp and *trxh2-2* 1100

606 bp) were sequenced for verification of the T-DNA fragment within the genes. Zygosity was  
607 examined by PCR amplification (min at 94°C, 1 min at 58°C, 2 min at 72°C; 35 cycles) of leaf  
608 DNA with the primer combination R498 [5'-GTCCCTTTTGCCATTGATAGCAAC-3'] and R490  
609 for *GLD-T* (1943 bp), P944 [5'-CTCGAGTGATGAAGGGAAATT-3'] and P945 for *TRXo1* (1800  
610 bp) and P957 and P958 [5'-CACAAAGACTATTGGTTAAGG-3'] for *TRXh2* (1035 bp).

### 611 **Gas exchange and chl a fluorescence measurements**

612 Fully expanded rosette leaves of plants at growth stage 5.1 (Boyes et al., 2001) were used to  
613 determine leaf gas exchange parameters. Standard measurements were carried out with the  
614 following conditions: photon flux density = 500  $\mu\text{mol m}^{-2} \text{s}^{-1}$ , chamber temperature = 25°C, flow  
615 rate = 300  $\mu\text{mol s}^{-1}$ , and relative humidity = 60 to 70%. To determine  $\text{CO}_2$  compensation points  
616 ( $\Gamma$ ),  $A/C_i$  curves were recorded with the following  $\text{CO}_2$  steps: 400, 300, 200, 100, 50, 0, and 400  
617 ppm. We used the gas-mixing system GMS600 (QCAL Messtechnik) to change the  $\text{O}_2$   
618 concentrations to 3 or 50% (balanced with  $\text{N}_2$ ). Oxygen inhibition of  $A$  was calculated from  
619 measurements at 21 and 50% oxygen using the equation:  $\text{O}_2$  inhibition =  $(A_{21} - A_{50})/A_{21} * 100$ .  
620 Calculation of  $\gamma$  was performed by linear regression of the  $\Gamma$ -versus-oxygen concentration curves  
621 and given as slopes of the respective functions. Chlorophyll a fluorescence was determined  
622 using a PAM fluorometer (DUAL-PAM-100; Walz). Maximum quantum yields of PSII ( $F_v/F_m$ )  
623 were determined after transfer into darkness (10 min) of the plants grown under HC and LC  
624 conditions.

### 625 **Metabolite analysis**

626 The determination of metabolites was carried out by liquid chromatography coupled to tandem  
627 mass spectrometry (LC-MS/MS) analysis using the LCMS-8050 system (Shimadzu, Japan). For  
628 this purpose, we harvested leaf material (~25 mg) from fully expanded rosette leaves of plants at  
629 growth stage 5.1 (Boyes et al., 2001) grown in HC or LC or following a transition from HC to LC  
630 at the end of the day (EoD, 9 h illumination). The material was immediately frozen in liquid  
631 nitrogen and stored at -80°C until further analysis. Extraction of soluble primary intermediates  
632 was carried out using LC-MS grade chemicals according to the method described in Arrivault et  
633 al., (2009; 2015) and the samples analyzed exactly as described in Reinholdt et al. (2019a). The  
634 compounds were identified and quantified using multiple reaction monitoring (MRM) according to  
635 the values provided in the LC-MS/MS method package and the LabSolutions software package  
636 (Shimadzu, Japan). Authentic standard substances (Merck, Germany) at varying concentrations

637 were used for calibration and peak areas normalized to signals of the internal standard  
638 ((morpholino)-ethanesulfonic acid (MES), 1 mg/ml). Data were interpreted using the Lab solution  
639 software package (Shimadzu, Japan).

#### 640 **Determination of pyridine nucleotide contents**

641 For these measurements we used plants at growth stage 5.1 (Boyes et al., 2001) and the same  
642 time points as stated for the metabolite analysis. The contents of NAD<sup>+</sup>/NADH and  
643 NADP<sup>+</sup>/NADPH were determined in acid and alkaline extracts using the protocol described in  
644 Zhang et al (2020). The assays involve the phenazine methosulfate-catalysed reduction of  
645 dichlorophenolindophenol (DCPIP) in the presence of ethanol and alcohol dehydrogenase (for  
646 NAD<sup>+</sup> and NADH) or glucose-6-P and glucose-6-P dehydrogenase (for NADP<sup>+</sup> and NADPH).  
647 Reduced and oxidized forms are distinguished by preferential destruction through  
648 measurements in acid or alkaline buffers.

#### 649 **<sup>13</sup>C-labeling and GC-MS analysis**

650 For the <sup>13</sup>C-isotope labeling approach, we used 5-week-old plants grown under standard  
651 conditions defined above but with high CO<sub>2</sub> (HC – 3000 ppm). Before onset of illumination, intact  
652 leaf's were cut from the plant rosette with a razor blade under weak green light to prevent  
653 induction of photosynthesis and photorespiration. Subsequently, the leaf's were put into  
654 Eppendorf tubes containing 10 mM [U-<sup>13</sup>C]-glycine in 10 mM MES-KOH solution, pH 6.5, and  
655 placed back into growth cabinets. Following 30- and 60-min illumination in normal air (LC - 400  
656 pmm CO<sub>2</sub>) and HC, the material was harvested after the petiole was cut from the leaf to prevent  
657 contamination with residual <sup>13</sup>C label, flash frozen in liquid nitrogen and stored in -80°C until  
658 further analysis. Metabolite extraction and GC-MS analysis were carried out exactly as  
659 described earlier (Lisec et al., 2006). Metabolite identification was carried out using the Golm  
660 Metabolome Database (<http://gmd.mpimp-golm.mpg.de/>) (Kopka et al., 2005). The detection of  
661 the isotopologues was made by using the software Xcalibur® 2.1 (Thermo Fisher Scientific,  
662 Waltham, MA, USA). The fractional <sup>13</sup>C-enrichment was then performed as described earlier  
663 (Lima et al., 2021).

#### 664 **Expression, purification and activity measurements of recombinant mtLPD1**

665 To obtain recombinant mtLPD1 from *Pisum sativum* for biochemical analysis we followed the  
666 same procedure described in Reinholdt et al. (2019a). The activity of mtLPD was assayed

667 spectrophotometrically at 340 nm in the forward direction as described previously (Timm et al.,  
668 2015) using 5-10  $\mu\text{g ml}^{-1}$  recombinant protein to initiate the reaction. Enzyme activity was  
669 recorded with three different NADH concentrations (0, 100 and 200  $\mu\text{M}$ ) and is expressed in  
670  $\mu\text{mol NADH per min}^{-1} \text{ mg protein}^{-1}$  at 25°C.

## 671 **Statistical analysis**

672 We used the two-tailed Student's *t* test (Microsoft Excel 10.0) and ANOVA analysis (Holm and  
673 Sidak test; Sigma Plot 11; Systat Software) for multiple genotypes for comparisons. The term  
674 significant is used only if the change in question was confirmed to be significant at the level of *\*p*  
675  $< 0.05$  and *\*\*p*  $< 0.01$ .

## 676 **Accession numbers**

677 The Arabidopsis Genome Initiative or GenBank/EMBL database contains sequence data from  
678 this article under the following accession numbers: *ADG1* (At5g48300), *TRX o1* (At2g35010),  
679 *TRX h2* (AT5G39950), *GLDT* (At1g11860) and pea *mtLPD1* (P31023).

## 680 **Supplemental Data**

681 **Supplemental Table S1.** Metabolite contents of the TCA-cycle and BCAAs in the mutant set  
682 grown under HC conditions.

683 **Supplemental Table S2.** Metabolite contents of the TCA-cycle and BCAAs in the mutant set  
684 grown under HC and shifted to LC conditions.

685 **Supplemental Table S3.** Metabolite contents of the TCA-cycle and BCAAs in the mutant set  
686 grown under HC conditions.

687 **Supplemental Table S4.** Pyridine nucleotide contents in the mutant set grown under HC  
688 conditions.

689 **Supplemental Table S5.** Pyridine nucleotide contents in the mutant set shifted from HC-to-LC  
690 conditions.

691 **Supplemental Table S6.** Pyridine nucleotide contents in the mutant set under LC conditions.

692 **Supplemental Figure S1.** Visual phenotype of *trxo1h2* shifted from HC-to-LC conditions.

693 **Supplemental Figure S2.** Genotype of multiple *TRX/GLDT* mutants.

694

## 695 **Acknowledgements**

696 We wish to thank Klaudia Michl (Rostock) and Ina Krahnert (Golm) for valuable technical  
697 assistance. The gift of the *adg1-1* mutant by Hans-Henning Kunz (München) and *gldt1-1* mutant  
698 by Hermann Bauwe (Rostock) is gratefully acknowledged. We thank the Nottingham Arabidopsis  
699 Stock Centre for donation of the T-DNA insertional lines. Work in the authors Lab was financially  
700 supported by the University of Rostock (S.T. and M.H.). The LC-MS equipment at the University  
701 of Rostock was financed through the HFBFG program (GZ: INST 264/125-1 FUGG to M.H.). S.A,  
702 Y.Z and A.R.F would like to thank the Max-Planck Society and European Union's Horizon 2020  
703 research and innovation program, project PlantaSYST (SGA-CSA No 664621 and No 739582  
704 under FPA No. 664620) for supporting their research. P.G. and L.-Y.H. gratefully acknowledge  
705 support by the Deutsche Forschungsgemeinschaft (TRR 175, The Green Hub). We further thank  
706 the research fellowship granted by the National Council for Scientific and Technological  
707 Development to DMD (CNPq, 303709/2020-0) and the scholarship granted by the Brazilian  
708 Federal Agency for Support and Evaluation of Graduate Education (CAPES-Brazil) to PVLS.

## 709 **Author Contributions**

710 S.T. conceived the project. S.T., and D.M.D., designed the research. S.T., P.G., D.M.D., and  
711 A.R.F. supervised the project. S.T., N.K., J.N., K.J., K.J., S.A., Y.Z., P.V.L.S., L-Y.H., and D.M.D.  
712 performed the research and analyzed data. A.R.F. and M.H. provided experimental equipment  
713 and tools. S.T. wrote the article, with additions and revisions from P.G., D.M.D., A.R.F. and M.H.  
714 All authors have read and approved the final version of the manuscript.

## 715 **Figure legends**

716 **Figure 1. Experimental setup and amounts of selected intermediates related to**  
717 **photorespiration and BCAA degradation in single *TRX* mutants and the wild type.**

718 **(A)** Overview of the experimental setup. Plants were grown under standard conditions (150  $\mu\text{mol}$   
719  $\text{m}^{-2} \text{s}^{-1}$  light, 400 ppm  $\text{CO}_2$ , 21%  $\text{O}_2$ ) to stage 5.1 (Boyes et al., 2001) and subsequently used for  
720 short-term environmental treatments as follows: (I) no photorespiration – 0  $\mu\text{mol} \text{m}^{-2} \text{s}^{-1}$  light  
721 (darkness), 400 ppm  $\text{CO}_2$ , 3, 21 and 40%  $\text{O}_2$ ; (II) suppressed photorespiration – 150  $\mu\text{mol} \text{m}^{-2} \text{s}^{-1}$   
722 light, 2000 ppm  $\text{CO}_2$ , 3, 21 and 40%  $\text{O}_2$ ; (III) active photorespiration - 150  $\mu\text{mol} \text{m}^{-2} \text{s}^{-1}$  light, 400  
723 ppm  $\text{CO}_2$ , 3, 21 and 40%  $\text{O}_2$ ; and (IV) enhanced photorespiration - 500  $\mu\text{mol} \text{m}^{-2} \text{s}^{-1}$  light, 400  
724 ppm  $\text{CO}_2$ , 3, 21 and 40%  $\text{O}_2$ , respectively. For all treatments we used plants in the second half  
725 of the illumination phase (4 to 10 h light) to ensure fully active and stable photosynthesis.

726 Absolute metabolite amounts ( $\text{nmol mg}^{-1} \text{FW}^{-1}$ ) were quantified by LC-MS/MS using leaf-discs (2  
727  $\text{cm}^2$ ) harvested after 15 minutes exposure to each condition following attachment of fully  
728 expanded leaves to the Licor chamber. Shown are mean values  $\pm$  SD ( $n = 4$ ) of **(B)** selected  
729 photorespiratory intermediates and **(C)** branched chain amino acids. Asterisks indicate  
730 significant alterations of the *TRX o1* and *h2* single mutant compared with the wild type in each  
731 condition according to Student's *t*-test ( $*p < 0.05$ ).

732 **Figure 2. Amounts of TCA-cycle intermediates in single *TRX* mutants and the wild type.**

733 Sampling and metabolite analysis were carried out as described in the legend of Fig. 1. Shown  
734 are mean values  $\pm$  SD ( $n = 4$ ) of selected TCA-cycle intermediates. Asterisks indicate significant  
735 alterations of the *TRX o1* and *h2* single mutant compared with the wild type in each condition  
736 according to Student's *t*-test ( $*p < 0.05$ ).

737 **Figure 3. O<sub>2</sub>-dependent gas exchange of the wild type and the *trxo1h2* mutant.**

738 Photosynthetic gas exchange parameters at varying O<sub>2</sub> concentrations (3%, 21%, and 50% O<sub>2</sub>,  
739 balanced with N<sub>2</sub>), were determined from plants grown for 8 weeks in normal air (10/14 h day-  
740 /night-cycle, 390 ppm CO<sub>2</sub>) to growth stage 5.1 (Boyce et al., 2001). Shown are mean values  $\pm$   
741 SD ( $N > 5$ ) of **(A)** net CO<sub>2</sub> uptake rates (A) at 390 ppm CO<sub>2</sub>, **(B)** oxygen inhibition of A, **(C)** net  
742 CO<sub>2</sub> uptake rates (A) at 2000 ppm CO<sub>2</sub>, **(D)** CO<sub>2</sub> compensation points ( $\Gamma$ ) and **(E)** slopes of the  
743  $\Gamma$ -versus-O<sub>2</sub> concentration curves ( $\gamma$ ). **(F)** Net CO<sub>2</sub> uptake rates (A) at different light intensities.  
744 Asterisks indicate significant alterations of the *trxo1h2* mutant compared with the wild type  
745 according to Student's *t*-test ( $*p < 0.05$ ,  $**p < 0.01$ , n. s. - not significant).

746 **Figure 4. Diagnostic photorespiratory intermediates in the wild type and *trxo1h2*.**

747 Absolute metabolite amounts ( $\text{nmol mg}^{-1} \text{FW}^{-1}$ ) were quantified by LC-MS/MS analysis from  
748 plants grown for 8 weeks in normal air (10/14 h day-/night-cycle, 390 ppm CO<sub>2</sub>) to growth stage  
749 5.1 (Boyce et al., 2001). At this stage, fully expanded plant-leaf's were attached to the Licor  
750 chamber in the second half of the illumination phase (4 to 10 h light) for controlled manipulation  
751 of O<sub>2</sub> and light conditions. Leaf-discs (2  $\text{cm}^2$ ) were harvested under growth conditions (control,  
752 21% O<sub>2</sub>, 150  $\mu\text{E}$  light) and after 15 min at 40% O<sub>2</sub> under 2 different light intensities (150 or 500  
753  $\mu\text{E}$ ). Shown are mean values  $\pm$  SD ( $n = 4$ ). Asterisks indicate significant alterations of *trxo1h2*  
754 compared with the wild type in each condition and rhombs to the control condition according to  
755 Student's *t*-test ( $*p < 0.05$ ,  $^{\#}p < 0.05$ , n.s. - not significant).

756 **Figure 5. Phenotype and chl a fluorescence images of the mutant set.**



757 Plants were grown under environmental controlled conditions (Percivall, 10 h/14 h day-/night-  
758 cycle) for 5 weeks in **(A)** high CO<sub>2</sub> (HC) and **(B)** low CO<sub>2</sub> (LC, normal air) conditions. At this time  
759 point, representative photographs were taken and chl a fluorescence measurement carried out.  
760 For quantitative data see Table 1.

761 **Figure 6. Glycine and serine in the mutant set under different conditions.**

762 Absolute **(A)** glycine and **(B)** serine amounts (nmol mg<sup>-1</sup> FW<sup>-1</sup>) were quantified by LC-MS/MS  
763 analysis. Leaf-material was harvested after 9 h of illumination from plants (A1, B1) grown for 8  
764 weeks (growth stage 5.1) under high CO<sub>2</sub> (HC, 3000 ppm), from plants (A2, B2) shifted from HC  
765 to low CO<sub>2</sub> (LC, 390 ppm; normal air) and (A3, B3) from plants continuously grown in LC. Shown  
766 are mean values ± SD (n = 5). Asterisks indicate significant alterations of the mutants compared  
767 with the wild type in each condition, rhombs of double *trxxgldt1* mutants compared with *gldt1* and  
768 plusses of the triple mutant compared to the double *trxxgldt* mutants according to Student's *t*-test  
769 (\**p* < 0.05, \*\**p* < 0.01, #*p* < 0.05, +*p* < 0.05).

770 **Figure 7. <sup>13</sup>C-enrichment in glycine and serine in selected mutants in HC and LC.**

771 Before onset of illumination, plant leaf's were cut from the rosettes in the dark following 5 weeks  
772 of growth in HC conditions. Subsequently, leaf's were fed with <sup>13</sup>C-glycine through the petiole for  
773 30 and 60 min of light in HC (dashed line) and LC (solid line) conditions. <sup>13</sup>C-enrichment in **(A)**  
774 glycine and **(B)** serine was followed through GC-MS analysis. Shown are mean values ± SE (N  
775 > 4). Asterisks indicate significant alterations of the mutants compared with the wild type in each  
776 condition according to Student's *t*-test (\**p* < 0.05). For further experimental details see material  
777 and methods section.

778 **Figure 8. Inhibition of *Pisum sativum* mtLPD1 (PsL) by NADH.**

779 **(A)** The rate of PsL activity was measured in the forward direction (3 mM DL-dihydrolipoic acid)  
780 as a function of NAD<sup>+</sup> (0.1, 0.2, 0.3, 0.4, 0.5, 1, 2, 3, 4 and 5 mM) with the indicated NADH  
781 concentrations (0, 0.1 and 0.2 mM). Specific enzyme activity is expressed in μmol NADH per  
782 min<sup>-1</sup> mg protein<sup>-1</sup> at 25°C. **(B)** Lineweaver-Burk plots of the three NADH concentrations. **(C)** The  
783 inhibitor constant (*K<sub>i</sub>*) was estimated by linear regression of (1) the slopes of the three  
784 Lineweaver-Burk plots at the three NADH concentrations versus (2) the NADH concentration.  
785 Shown are mean values ± SD from at least three technical replicates.

786

787 **TABLES**

788 **Table 1. Growth and  $F_v/F_m$  of the mutant set and the wild type in HC and LC conditions.**

789 Plants were grown under environmental controlled conditions in HC (3000 ppm CO<sub>2</sub>) or LC (390  
790 ppm CO<sub>2</sub>) for 5 weeks. For representative photographs see Fig. 5. Values are means ± SD (n =  
791 7). Asterisks indicate significant changes to the wild type (\**p* < 0.05, \*\**p* < 0.01), bold letters to  
792 the *gldt1-1* single mutant and rhombs to the TRX double mutants in the *gldt1-1* background  
793 based on students *t*-test (<sup>#</sup>*p* < 0.05).

| <b>Parameter (HC)</b> |                                  |                         |                             |
|-----------------------|----------------------------------|-------------------------|-----------------------------|
| <b>Genotype</b>       | <b>Diameter</b>                  | <b>Total leaf-count</b> | <b><math>F_v/F_m</math></b> |
| Col.0                 | 11.23 ± 0.64                     | 15.29 ± 1.11            | 0.752 ± 0.004               |
| <i>trxo1</i>          | 11.14 ± 0.63                     | 14.71 ± 1.11            | 0.750 ± 0.007               |
| <i>trxh2</i>          | 11.17 ± 0.57                     | 14.57 ± 1.51            | 0.757 ± 0.005               |
| <i>gldt1</i>          | 10.63 ± 0.48                     | 14.86 ± 0.90            | 0.755 ± 0.009               |
| <i>adg1</i>           | 5.94 ± 0.32**                    | 11.43 ± 1.27**          | 0.716 ± 0.013**             |
| <i>trxo1xgldt1</i>    | 10.74 ± 0.68                     | 14.43 ± 1.72            | 0.749 ± 0.007               |
| <i>trxh2xgldt1</i>    | 11.31 ± 0.86                     | 14.71 ± 1.60            | 0.752 ± 0.010               |
| <i>triple</i>         | 10.80 ± 0.69                     | 14.14 ± 1.35            | 0.753 ± 0.005               |
| <i>trxo1h2</i>        | 10.49 ± 0.83                     | 12.67 ± 1.86            | 0.750 ± 0.006               |
| <b>Parameter (LC)</b> |                                  |                         |                             |
| Col.0                 | 7.60 ± 0.37                      | 12.00 ± 0.82            | 0.744 ± 0.005               |
| <i>trxo1</i>          | 7.44 ± 0.82                      | 12.00 ± 1.00            | 0.742 ± 0.005               |
| <i>trxh2</i>          | 7.60 ± 0.48                      | 11.86 ± 1.68            | 0.744 ± 0.006               |
| <i>gldt1</i>          | 5.17 ± 0.66**                    | 12.14 ± 1.07            | 0.722 ± 0.007**             |
| <i>adg1</i>           | 4.50 ± 0.59**                    | 9.57 ± 0.79**           | 0.732 ± 0.005**             |
| <i>trxo1xgldt1</i>    | <b>4.11 ± 0.41**</b>             | <b>8.57 ± 0.79**</b>    | <b>0.710 ± 0.009**</b>      |
| <i>trxh2xgldt1</i>    | <b>3.16 ± 0.86**</b>             | <b>9.86 ± 1.35**</b>    | <b>0.681 ± 0.028**</b>      |
| <i>triple</i>         | <b>2.40 ± 0.14**<sup>#</sup></b> | <b>8.17 ± 0.75**</b>    | <b>0.663 ± 0.025**</b>      |
| <i>trxo1h2</i>        | 6.80 ± 0.46**                    | 10.71 ± 1.11**          | 0.746 ± 0.003               |

794

795 **Table 2. Pyridine nucleotide ratios in the mutant set under different conditions.**

796 Pyrimidine nucleotide contents were determined from plants grown to growth stage 5.1 (Boyes  
797 et al., 2001) at the end of the day (EoD, 9 h illumination) in HC, following a shift from HC-to-LC  
798 and in LC grown plants. Values are means  $\pm$  SD (n = 6) and bold letters indicate values  
799 statistically significant from the wild type based on Students *t*-test (\**p* < 0.05, \*\**p* < 0.01). For  
800 single values please see Supplemental Tables 4-6.

| Genotype           | NADH/NAD <sup>+</sup>                 | NADH/NAD <sup>+</sup>                 | NADH/NAD <sup>+</sup>                 |
|--------------------|---------------------------------------|---------------------------------------|---------------------------------------|
|                    | HC                                    | LC-shift                              | LC                                    |
| Col.0              | 0.119 $\pm$ 0.008                     | 0.072 $\pm$ 0.018                     | 0.136 $\pm$ 0.017                     |
| <i>trxo1</i>       | 0.144 $\pm$ 0.027                     | 0.074 $\pm$ 0.029                     | 0.108 $\pm$ 0.024                     |
| <i>trxh2</i>       | 0.139 $\pm$ 0.031                     | <b>0.103 <math>\pm</math> 0.012*</b>  | 0.116 $\pm$ 0.039                     |
| <i>gldt1</i>       | 0.136 $\pm$ 0.025                     | 0.086 $\pm$ 0.021                     | 0.108 $\pm$ 0.011                     |
| <i>trxo1xgldt1</i> | 0.118 $\pm$ 0.020                     | <b>0.114 <math>\pm</math> 0.018*</b>  | <b>0.099 <math>\pm</math> 0.001**</b> |
| <i>trxh2xgldt1</i> | 0.128 $\pm$ 0.020                     | 0.089 $\pm$ 0.016                     | <b>0.102 <math>\pm</math> 0.010**</b> |
| <i>triple</i>      | 0.130 $\pm$ 0.017                     | <b>0.112 <math>\pm</math> 0.015*</b>  | <b>0.096 <math>\pm</math> 0.015*</b>  |
| <i>trxo1h2</i>     | <b>0.145 <math>\pm</math> 0.010**</b> | <b>0.106 <math>\pm</math> 0.016*</b>  | <b>0.108 <math>\pm</math> 0.017*</b>  |
| Genotype           | NADPH/NADP <sup>+</sup>               | NADPH/NADP <sup>+</sup>               | NADPH/NADP <sup>+</sup>               |
|                    | HC                                    | LC-shift                              | LC                                    |
| Col.0              | 0.052 $\pm$ 0.013                     | 0.609 $\pm$ 0.121                     | 0.077 $\pm$ 0.011                     |
| <i>trxo1</i>       | 0.047 $\pm$ 0.016                     | <b>0.460 <math>\pm</math> 0.082*</b>  | 0.081 $\pm$ 0.018                     |
| <i>trxh2</i>       | 0.057 $\pm$ 0.013                     | <b>0.423 <math>\pm</math> 0.058**</b> | 0.080 $\pm$ 0.023                     |
| <i>gldt1</i>       | 0.067 $\pm$ 0.008                     | 0.617 $\pm$ 0.082                     | <b>0.101 <math>\pm</math> 0.018*</b>  |
| <i>trxo1xgldt1</i> | 0.052 $\pm$ 0.007                     | 0.678 $\pm$ 0.118                     | <b>0.109 <math>\pm</math> 0.015**</b> |
| <i>trxh2xgldt1</i> | 0.060 $\pm$ 0.010                     | 0.650 $\pm$ 0.088                     | <b>0.129 <math>\pm</math> 0.011**</b> |
| <i>triple</i>      | 0.057 $\pm$ 0.015                     | 0.697 $\pm$ 0.096                     | <b>0.104 <math>\pm</math> 0.016*</b>  |
| <i>trxo1h2</i>     | 0.072 $\pm$ 0.015                     | 0.656 $\pm$ 0.112                     | <b>0.100 <math>\pm</math> 0.017*</b>  |

801

802

803

804 **Literature cited**

- 805 **Ancín M, Larraya L, Florez-Sarasa I, Bénard C, Fernández-San Millán A, Veramendi J,**  
806 **Gibon Y, Fernie AR, Aranjuelo I, Farran I** (2021) Overexpression of thioredoxin m in  
807 chloroplasts alters carbon and nitrogen partitioning in tobacco. *Journal of Experimental Botany*,  
808 **72**: 4949–4964
- 809 **Araújo WL, Nunes-Nesi A, Nikoloski Z, Sweetlove LJ, Fernie AR** (2012) Metabolic control  
810 and regulation of the tricarboxylic acid cycle in photosynthetic and heterotrophic plant tissues.  
811 *Plant, Cell & Environment*, **35**: 1-21
- 812 **Balmer Y, Vensel WH, Tanaka CK, Hurkman WJ, Gelhaye E, Rouhier N, Jacquot JP,**  
813 **Manieri W, Schürmann P, Droux M, Buchanan BB** (2004) Thioredoxin links redox to the  
814 regulation of fundamental processes of plant mitochondria. *Proceedings of the National*  
815 *Academy of Sciences*, **101**: 2642-2647
- 816 **Bauwe H, Hagemann M, Kern R, Timm S** (2012) Photorespiration has a dual origin and  
817 manifold links to central metabolism. *Curr Opin Plant Biol* **15**: 269–275
- 818 **Bloom AJ, Burger M, Rubio Asensio JS, Cousins AB** (2010) Carbon dioxide enrichment  
819 inhibits nitrate assimilation in wheat and *Arabidopsis*. *Science*, **328**: 899–903
- 820 **Bloom AJ** (2015) Photorespiration and nitrate assimilation: a major intersection between plant  
821 carbon and nitrogen. *Photosynthesis Research*, **123**: 117-28
- 822 **Bourguignon J, Neuburger M, Douce R** (1988) Resolution and characterization of the glycine  
823 cleavage reaction in pea leaf mitochondria. Properties of the forward reaction catalyzed by  
824 glycine decarboxylase and serine hydroxymethyltransferase. *Biochemical Journal*, **255**: 169-178
- 825 **Boyes DC, Zayed AM, Ascenzi R, McCaskill AJ, Hoffman NE, Davis KR, Grolach J** (2001)  
826 Growth stage-based phenotypic analysis of *Arabidopsis*: A model for high throughput functional  
827 genomics in plants. *Plant Cell*, **13**: 1499–1510
- 828 **Buchanan BB** (2016) The path to thioredoxin and redox regulation in chloroplasts. *Annual*  
829 *Review in Plant Biology*, **67**: 1-24
- 830 **Buchanan BB** (2017) The path to thioredoxin and redox regulation beyond chloroplasts. *Annual*  
831 *Review of Plant Biology*, **58**: 1–24

- 832 **Calderón A, Sánchez-Guerrero A, Ortiz-Espín A, Martínez-Alcalá I, Camejo D, Jiménez A,**  
833 **Sevilla F** (2018) Lack of mitochondrial thioredoxin o1 is compensated by antioxidant  
834 components under salinity in *Arabidopsis thaliana* plants. *Physiologia Plantarum*, **164**: 251-267
- 835 **Cousins AB, Walker BJ, Pracharoenwattana I, Smith SM, Badger MR** (2011) Peroxisomal  
836 hydroxypyruvate reductase is not essential for photorespiration in *Arabidopsis* but its absence  
837 causes an increase in the stoichiometry of photorespiratory CO<sub>2</sub> release. *Photosynth Res* **108**:  
838 91–100
- 839 **da Fonseca-Pereira P, Souza PVL, Hou LY, Schwab S, Geigenberger P, Nunes-Nesi A,**  
840 **Timm S, Fernie AR, Thormählen I, Araújo WL, Daloso DM** (2020) Thioredoxin h2 contributes  
841 to the redox regulation of mitochondrial photorespiratory metabolism. *Plant, Cell & Environment*,  
842 **43**: 188-208
- 843 **daFonseca-Pereira P, Souza PVL, Fernie AR, Timm S, Daloso DM, Araújo WL** (2021)  
844 Thioredoxin-mediated regulation of (photo)respiration and central metabolism, *Journal of*  
845 *Experimental Botany*, **72**: 5987–6002
- 846 **Daloso, DM, Müller K, Obata T, Florian A, Tohge T, Bottcher A, Riondet C, Bariat L, Carrari**  
847 **F, Nunes-Nesi A, Buchanan BB, Reichheld J-P, Araújo WL, Fernie AR** (2015) Thioredoxin, a  
848 master regulator of the tricarboxylic acid cycle in plant mitochondria. *Proceedings of the National*  
849 *Academy of Sciences of the United States of America*, **112**: 1392-1400
- 850 **Dellero Y, Lamothe-Sibold M, Jossier M, Hodges M** (2015) *Arabidopsis thaliana* ggt1  
851 photorespiratory mutants maintain leaf carbon/nitrogen balance by reducing RuBisCO content  
852 and plant growth. *Plant Journal*, **83**: 1005-18
- 853 **Dellero Y, Mauve C, Jossier M, Hodges M** (2021) The Impact of Photorespiratory Glycolate  
854 Oxidase Activity on *Arabidopsis thaliana* Leaf Soluble Amino Acid Pool Sizes during Acclimation  
855 to Low Atmospheric CO<sub>2</sub> Concentrations. *Metabolites*, **11**: 501
- 856 **Delorme-Hinoux V, Bangash SAK, Meyer AJ, Reichheld JP** (2016) Nuclear thiol redox  
857 systems in plants. *Plant Science*. **243**: 84–95
- 858 **Engel N, Eisenhut M, Qu N, Bauwe H** (2008) *Arabidopsis* mutants with strongly reduced levels  
859 of the T-protein subunit of glycine decarboxylase. In *Photosynthesis. Energy from the Sun: 14th*  
860 *International Conference of Photosynthesis*, Allen, J. F., Gantt, E., Golbeck, J. H., Osmond, C.  
861 B. (Eds) Springer, 819-822

- 862 **Florez-Sarasa I, Obata T, Del-Saz NSFN, Reichheld JP, Meyer EH, Rodriguez-Concepcion**  
863 **M, Ribas-Carbo M, Fernie AR** (2019) The lack of thioredoxin TRXo1 affects in vivo alternative  
864 oxidase activity and carbon metabolism under different light conditions. *Plant Cell Physiology*,  
865 **60**: 2369-2381
- 866 **Florian A, Araújo WL, Fernie AR** (2013) New insights into photorespiration obtained from  
867 metabolomics. *Plant Biology*, **15**: 656-66
- 868 **Geigenberger P, Thormählen I, Daloso DM, Fernie AR** (2017) The unprecedented versatility  
869 of the plant thioredoxin system. *Trends in Plant Sciences*, **22**: 249-262
- 870 **Hasse D, Andersson E, Carlsson G, Masloboy A, Hagemann M, Bauwe H, Andersson I**  
871 (2013) Structure of the homodimeric glycine decarboxylase P-protein from *Synechocystis* PCC  
872 6803 suggests a mechanism for redox regulation. *Journal of Biological Biochemistry*, **288**:  
873 35333-35345
- 874 **Hou LY, Lehmann M, Geigenberger P** (2021) Thioredoxin *h2* and *o1* Show Different  
875 Subcellular Localizations and Redox-Active Functions, and Are Extrachloroplastic Factors  
876 Influencing Photosynthetic Performance in Fluctuating Light. *Antioxidants*, **10**: 705
- 877 **Kim Y, Ingram LO, Shanmugam KT** (2008) Dihydrolipoamide dehydrogenase mutation alters  
878 the NADH sensitivity of pyruvate dehydrogenase complex of *Escherichia coli* K-12. *Journal of*  
879 *Bacteriology* **190**: 3851–3858
- 880 **Kopka J, Schauer N, Krueger S, Birkemeyer C, Usadel B, Bergmüller E, Dörmann P,**  
881 **Weckwerth W, Gibon Y, Stitt M, Willmitzer L, Fernie AR, Steinhauser D** (2005)  
882 GMD@CSB.DB: The Golm metabolome database. *Bioinformatics*, **21**: 1635–1638
- 883 **Laloi C, Rayapuram N, Chartier Y, Grienberger JM, Bonnard G, Meyer Y** (2001)  
884 Identification and characterization of a mitochondrial thioredoxin system in plants. *Proceedings*  
885 *of the National Academy of Sciences of the United States of America*, **98**: 14144–14149
- 886 **Lee, E.S., Park, J.H., Wi, S.D. et al.** (2021) Redox-dependent structural switch and CBF  
887 activation confer freezing tolerance in plants. *Nature Plants*, **7**: 914–922
- 888 **Lim, S.L., Voon, C.P., Guan, X. et al.** (2020) In planta study of photosynthesis and  
889 photorespiration using NADPH and NADH/NAD<sup>+</sup> fluorescent protein sensors. *Nature*  
890 *Communications*, **11**: 3238
- 891 **Lima VF, Erban A, Daubermann AG, Freire FBS, Porto NP, Cândido-Sobrinho SA,**  
892 **Medeiros DB, Schwarzländer M, Fernie AR, dos Anjos L, Kopka J, Daloso DM** (2021),

- 893 Establishment of a GC-MS-based <sup>13</sup>C-positional isotopomer approach suitable for investigating  
894 metabolic fluxes in plant primary metabolism. *Plant Journal*, **108**: 1213-1233
- 895 **Lin TP, Caspar T, Sommerville C, Preiss J** (1988) Isolation and characterization of a  
896 starchless mutant of *Arabidopsis thaliana* (L.) Heynh. Lacking ADP-glucose pyrophosphorylase  
897 activity. *Plant Physiology*, **86**: 1131-1135
- 898 **Lisec J, Schauer N, Kopka J, Willmitzer L, Fernie AR** (2006) Gas chromatography mass  
899 spectrometry-based metabolite profiling in plants. *Nature Protocols*, **1**: 387–396
- 900 **Meng L, Wong JH, Feldman LJ, Lemaux PG, Buchanan BB** (2010) A membrane-associated  
901 thioredoxin required for plant growth moves from cell to cell, suggestive of a role in intercellular  
902 communication. *Proceedings of the National Academy of Sciences USA*, **107**: 3900–3905
- 903 **Michelet L, Zaffagnini M, Morisse S, Sparla F, Pérez-Pérez ME, Francia F, Danon A,**  
904 **Marchand CH, Fermani S, Trost P, Lemaire SD** (2013) Redox regulation of the Calvin-Benson  
905 cycle: something old, something new. *Front Plant Sci*, **4**: 470.
- 906 **Millar AH, Knorr C, Leaver CJ, Hill SA** (1998) Plant mitochondrial pyruvate dehydrogenase  
907 complex: purification and identification of catalytic components in potato. *The Biochemical*  
908 *Journal*, **334**: 571–576
- 909 **Millar AH, Hill SA, Leaver CJ** (1999) Plant mitochondrial 2-oxoglutarate dehydrogenase  
910 complex: purification and characterization in potato. *The Biochemical Journal*, **343**: 327–334
- 911 **Møller IM, Igamberdiev AU, Bykova NV, Finkemeier I, Rasmusson AG, Schwarzländer M**  
912 (2020) Matrix redox physiology governs the regulation of plant mitochondrial metabolism through  
913 posttranslational protein modification. *Plant Cell*, **32**: 573-594
- 914 **Nietzel T, Mostertz J, Ruberti C, Née G, Fuchs P, Wagner S, Moseler A, Müller-Schüssle**  
915 **SJ, Benamar A, Poschet G, Büttner M, Moller IM, Lilling CH, Macherel D, Wirtz M, Hell R,**  
916 **Finkemeier I, Meyer AJ, Hochgräfe F, Schwarzländer M** (2020) Redox-mediated kick-start of  
917 mitochondrial energy metabolism drives resource-efficient seed germination. *Proceedings of the*  
918 *National Academy of Sciences*, **117**: 741-751
- 919 **Nikkanen L, Toivola J, Diaz MG, Rintamäki E** (2017) Chloroplast thioredoxin systems:  
920 prospects for improving photosynthesis. *Philosophical Transactions of the Royal Society B*, **372**:  
921 20160474.
- 922 **Nunes-Nesi A, Araújo WL, Obata T, Fernie AR** (2013) Regulation of the mitochondrial  
923 tricarboxylic acid cycle. *Current Opinion in Plant Biology*, **16**: 335-43

- 924 **Reichheld J-P, Meyer E, Khafif M, Bonnard G, Meyer Y** (2005) AtNTRB is the major  
925 mitochondrial thioredoxin reductase in *Arabidopsis thaliana*. *FEBS Letters*, 579:337–342
- 926 **Reinholdt O, Schwab S, Zhang Y, Reichheld JP, Fernie AR, Hagemann M, Timm S** (2019a)  
927 Redox-regulation of photorespiration through mitochondrial thioredoxin o1. *Plant Physiology*,  
928 **181**: 442-457
- 929 **Reinholdt O, Bauwe H, Hagemann M, Timm S** (2019b) Redox-regulation of mitochondrial  
930 metabolism through thioredoxin o1 facilitates light induction of photosynthesis. *Plant Signaling &*  
931 *Behavior*, 14: 1674607
- 932 **Ros R, Muñoz-Bertomeu J, Krueger S** (2014) Serine in plants: biosynthesis, metabolism, and  
933 functions. *Trends in Plants Sciences*, **19**: 564-569
- 934 **Sweetlove LJ, Beard KFM, Nunes-Nesi A, Fernie AR, Ratcliffe RG** (2010) Not just a circle:  
935 flux modes in the plant TCA cycle. *Trends in Plant Science*, **15**: 462–470
- 936 **Tcherkez G, Cornic G, Bligny R, Gout E, Ghashghaie J.** (2005) *In Vivo* respiratory  
937 metabolism of illuminated leaves. *Plant Physiology*, **138**: 1596–1606
- 938 **Thormählen I, Ruber J, Von Roepenack-Lahaye E, Ehrlich SM, Massot V, Hümmer C,**  
939 **Tezycka J, Issakidis-Bourguet E, Geigenberger P** (2013) Inactivation of thioredoxin f1 leads  
940 to decreased light activation of ADP-glucose pyrophosphorylase and altered diurnal starch  
941 turnover in leaves of *Arabidopsis* plants. *Plant, Cell & Environment*, **36**: 16-29
- 942 **Thormählen I, Zupok A, Rescher J, Leger J, Weissenberger S, Groysman J, Orwat A,**  
943 **Chatel-Innocenti G, Issakidis-Bourguet E, Armbruster U, Geigenberger P** (2017)  
944 Thioredoxins play a crucial role in dynamic acclimation of photosynthesis in fluctuating light.  
945 *Molecular Plant*, **10**: 168–182.
- 946 **Timm S, Florian A, Jahnke K, Nunes-Nesi A, Fernie AR, Bauwe H** (2011) The  
947 hydroxypyruvate-reducing system in *Arabidopsis*: Multiple enzymes for the same end. *Plant*  
948 *Physiol* **155**: 694–705
- 949 **Timm S, Mielewczik M, Florian A, Frankenbach S, Dreissen A, Hocken N, Fernie AR,**  
950 **Walter A, Bauwe H** (2012) High-to-low CO<sub>2</sub> acclimation reveals plasticity of the photorespiratory  
951 pathway and indicates regulatory links to cellular metabolism of *Arabidopsis*. *PLoS One* **7**:  
952 e42809
- 953 **Timm S, Bauwe H** (2013) The variety of photorespiratory phenotypes - employing the current  
954 status for future research directions on photorespiration. *Plant Biology*, **15**: 737–747



- 955 **Timm S, Giese J, Engel N, Wittmiß M, Florian A, Fernie AR, Bauwe H** (2018) T-protein is  
956 present in large excess over the other proteins of the glycine cleavage system of Arabidopsis.  
957 *Planta*, **247**: 41-51
- 958 **Timm S, Hagemann M** (2020) Photorespiration – how is it regulated and how does it regulate  
959 overall plant metabolism. *Journal of Experimental Botany*, **71**: 3955-3965
- 960 **Wang Y, Chen X, Spengler K, Terberger K, Boehm M, Appel J, Barske T, Timm S, Battchikova**  
961 **N, Hagemann M, Gutekunst K** (2022) Pyruvate:ferredoxin oxidoreductase and low abundant  
962 ferredoxins support aerobic photomixotrophic growth in cyanobacteria. *eLife*, **11**: e71339
- 963 **Zaffagnini M, Fermani S, Marchand CH, Costa A, Sparla F, Rouhier N, Geigenberger P,**  
964 **Lemaire SD, Trost P** (2019) Redox Homeostasis in Photosynthetic Organisms: Novel and  
965 Established Thiol-Based Molecular Mechanisms. *Antioxidants & Redox Signaling*, **31**: 155-210
- 966 **Zhang Y, Krahnert I, Bolze A, Gibon Y, Fernie AR** (2020) Adenine nucleotide and  
967 nicotinamide adenine dinucleotide measurements in plants. *Current Protocols in Plant*  
968 *Biology*, **5**, e20115.
- 969 **Zhang Y, Giese J, Mae-Lin Kerbler S, Siemiatkowska B, Souza LP, Alpers J, et al.** (2021)  
970 Two mitochondrial phosphatases, PP2c63 and Sal2, are required for posttranslational regulation  
971 of the TCA cycle in Arabidopsis. *Molecular Plant*, **14**: 1104–1118
- 972

973 **Figures**

974 **Figure 1.**

**A - Experimental setup**

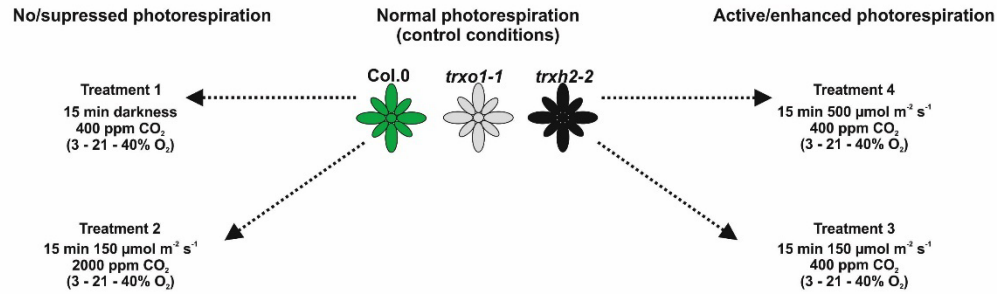

**B - Photorespiration**

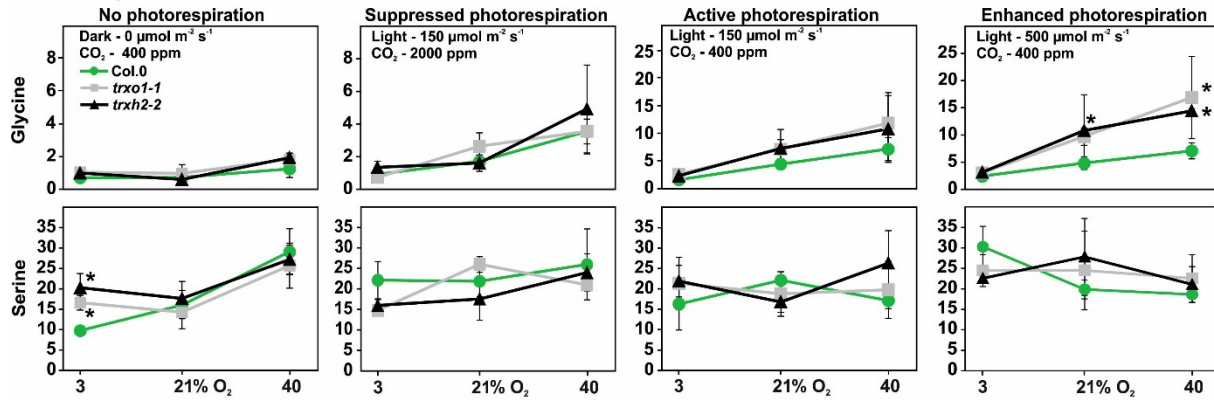

**C - BCAA degradation**

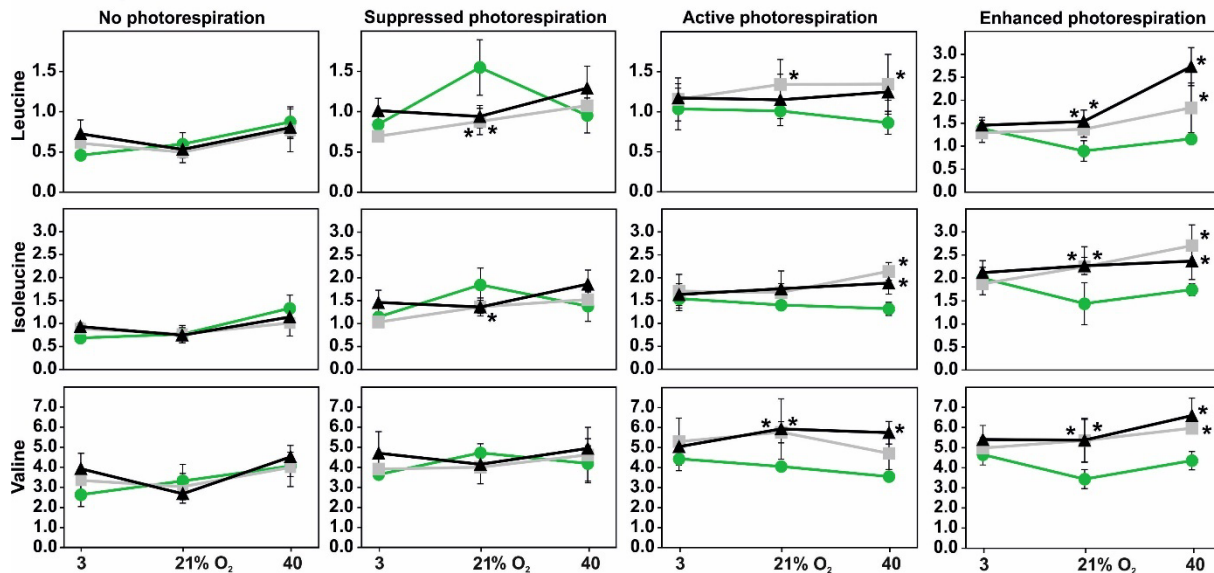

975

976 **Figure 1. Experimental setup and amounts of selected intermediates related to**  
 977 **photorespiration and BCAA degradation in single *TRX* mutants and the wild type.**

978 **(A)** Overview of the experimental setup. Plants were grown under standard conditions (150  $\mu\text{mol}$   
979  $\text{m}^{-2} \text{s}^{-1}$  light, 400 ppm  $\text{CO}_2$ , 21%  $\text{O}_2$ ) to stage 5.1 (Boyes et al., 2001) and subsequently used for  
980 short-term environmental treatments as follows: (I) no photorespiration – 0  $\mu\text{mol} \text{m}^{-2} \text{s}^{-1}$  light  
981 (darkness), 400 ppm  $\text{CO}_2$ , 3, 21 and 40%  $\text{O}_2$ ; (II) suppressed photorespiration – 150  $\mu\text{mol} \text{m}^{-2} \text{s}^{-1}$   
982 light, 2000 ppm  $\text{CO}_2$ , 3, 21 and 40%  $\text{O}_2$ ; (III) active photorespiration - 150  $\mu\text{mol} \text{m}^{-2} \text{s}^{-1}$  light, 400  
983 ppm  $\text{CO}_2$ , 3, 21 and 40%  $\text{O}_2$ ; and (IV) enhanced photorespiration - 500  $\mu\text{mol} \text{m}^{-2} \text{s}^{-1}$  light, 400  
984 ppm  $\text{CO}_2$ , 3, 21 and 40%  $\text{O}_2$ , respectively. For all treatments we used plants in the second half  
985 of the illumination phase (4 to 10 h light) to ensure fully active and stable photosynthesis.  
986 Absolute metabolite amounts ( $\text{nmol mg}^{-1} \text{FW}^{-1}$ ) were quantified by LC-MS/MS using leaf-discs (2  
987  $\text{cm}^2$ ) harvested after 15 minutes exposure to each condition following attachment of fully  
988 expanded leaves to the Licor chamber. Shown are mean values  $\pm$  SD ( $n = 4$ ) of **(B)** selected  
989 photorespiratory intermediates and **(C)** branched chain amino acids. Asterisks indicate  
990 significant alterations of the *TRX o1* and *h2* single mutant compared with the wild type in each  
991 condition according to Student's *t*-test ( $*p < 0.05$ ).

992

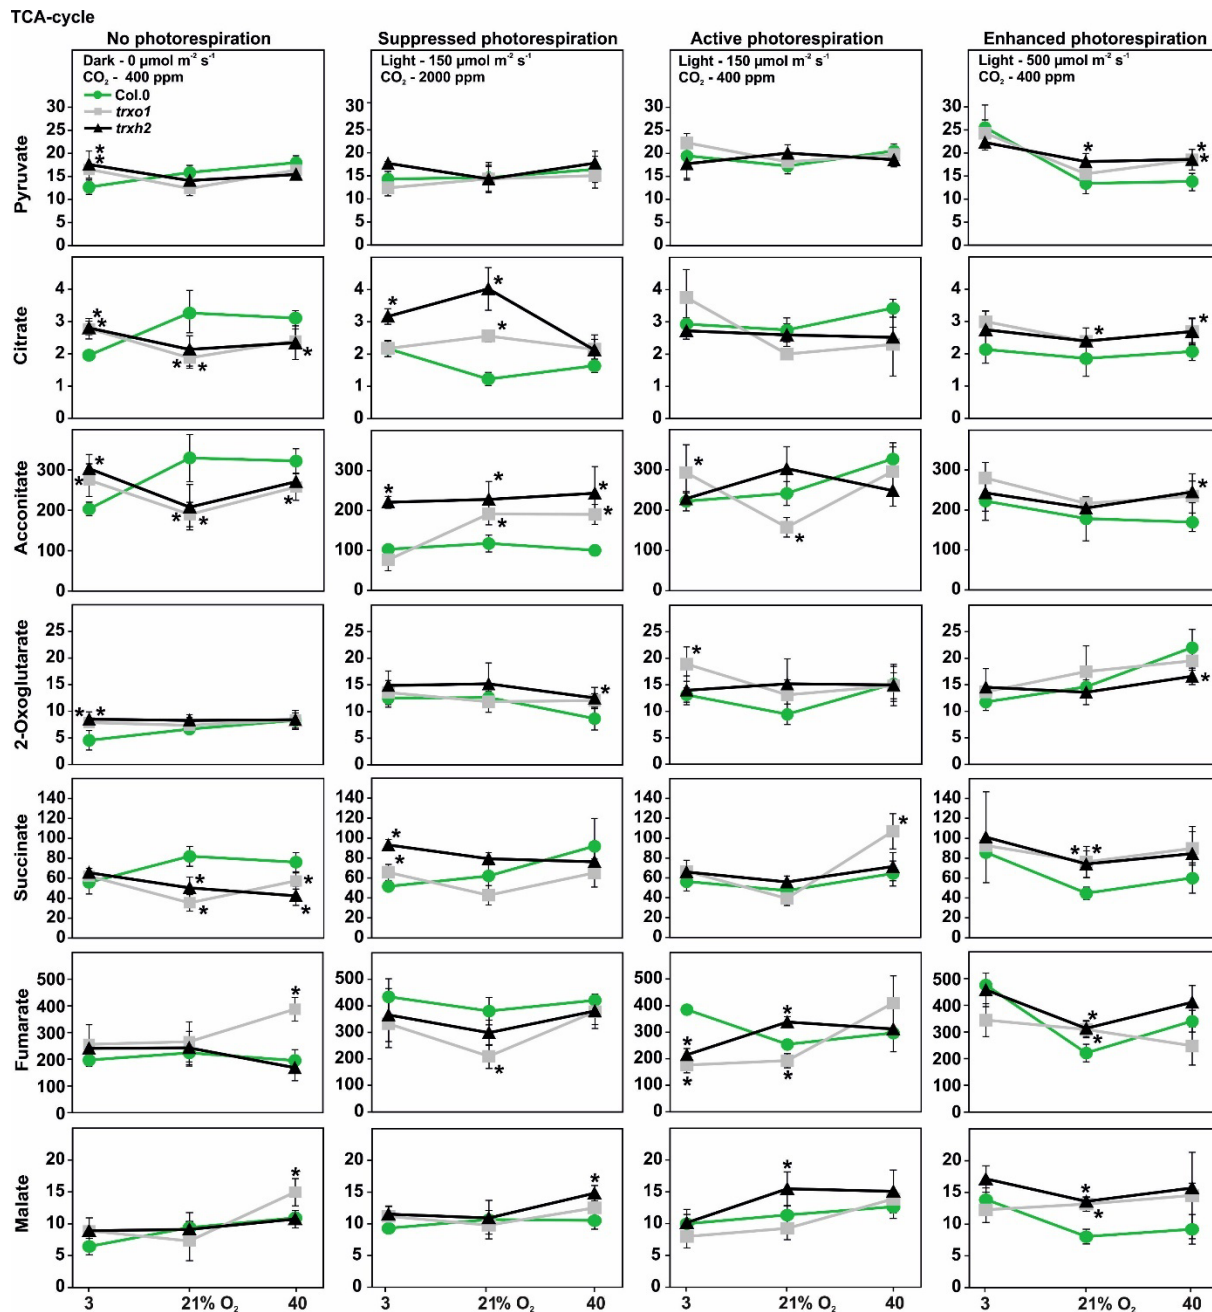

993

994 **Figure 2. Amounts of TCA-cycle intermediates in single *TRX* mutants and the wild type.**

995 Sampling and metabolite analysis were carried out as described in the legend of Fig. 1. Shown  
 996 are mean values  $\pm$  SD ( $n = 4$ ) of selected TCA-cycle intermediates. Asterisks indicate significant  
 997 alterations of the *TRX o1* and *h2* single mutant compared with the wild type in each condition  
 998 according to Student's *t*-test ( $*p < 0.05$ ).

999

1000

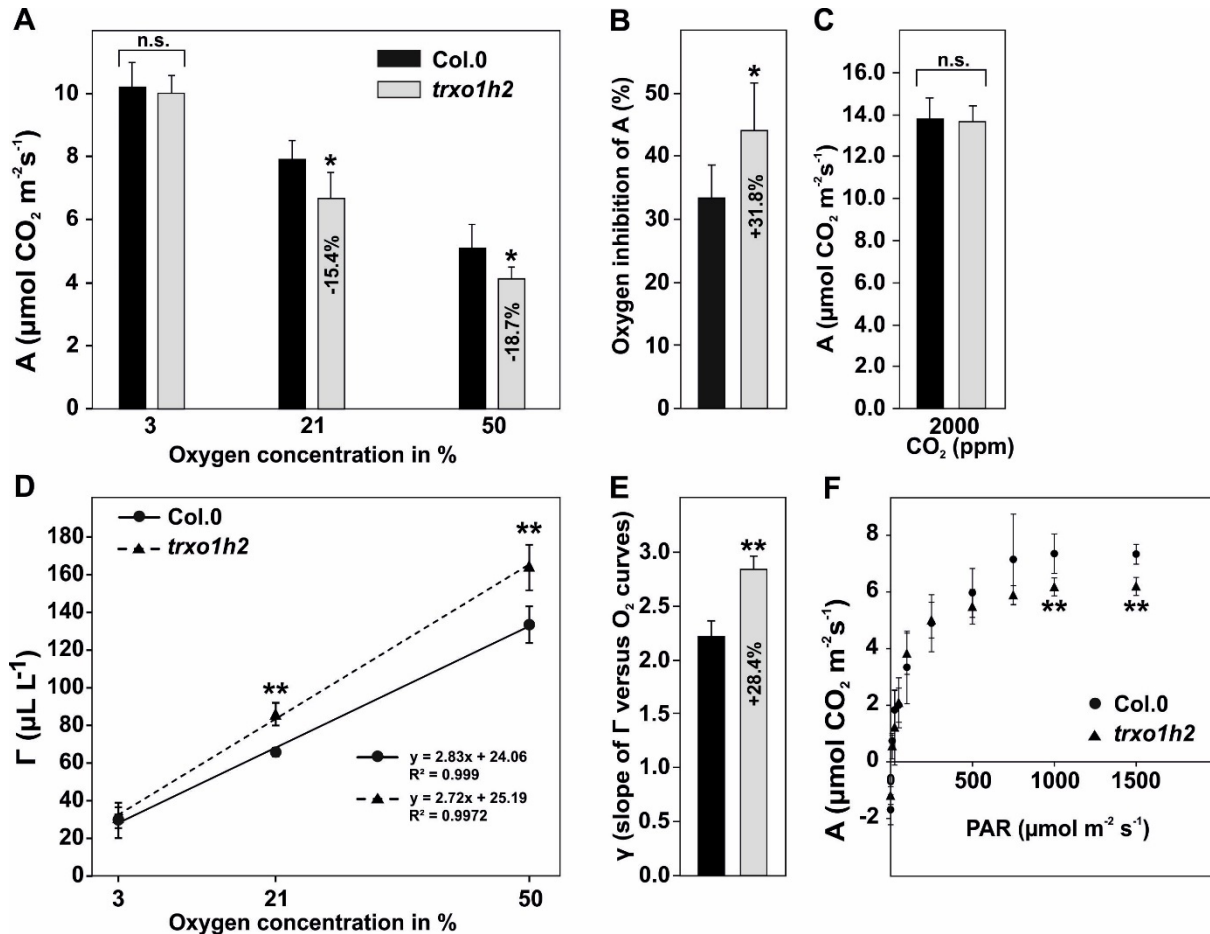

1001

1002 **Figure 3. O<sub>2</sub>-dependent gas exchange of the wild type and the *trxo1h2* mutant.**

1003 Photosynthetic gas exchange parameters at varying O<sub>2</sub> concentrations (3%, 21%, and 50% O<sub>2</sub>,  
 1004 balanced with N<sub>2</sub>), were determined from plants grown for 8 weeks in normal air (10/14 h day-  
 1005 /night-cycle, 390 ppm CO<sub>2</sub>) to growth stage 5.1 (Boyes et al., 2001). Shown are mean values  $\pm$   
 1006 SD ( $n > 5$ ) of **(A)** net CO<sub>2</sub> uptake rates (A) at 390 ppm CO<sub>2</sub>, **(B)** oxygen inhibition of A, **(C)** net  
 1007 CO<sub>2</sub> uptake rates (A) at 2000 ppm CO<sub>2</sub>, **(D)** CO<sub>2</sub> compensation points ( $\Gamma$ ) and **(E)** slopes of the  
 1008  $\Gamma$ -versus-O<sub>2</sub> concentration curves ( $\gamma$ ). **(F)** Net CO<sub>2</sub> uptake rates (A) at different light intensities.  
 1009 Asterisks indicate significant alterations of the *trxo1h2* mutant compared with the wild type  
 1010 according to Student's *t*-test (\* $p < 0.05$ , \*\* $p < 0.01$ , n. s. - not significant).

1011

1012

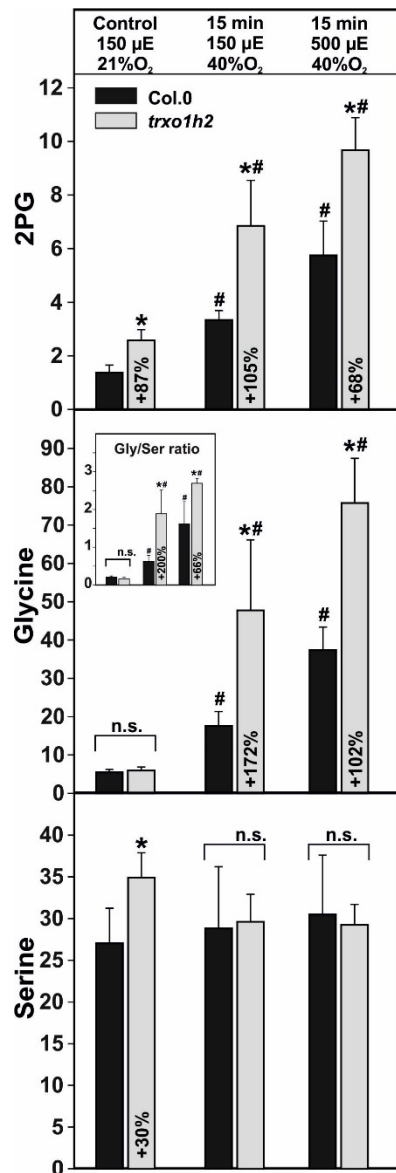

1013

1014 **Figure 4. Diagnostic photorespiratory intermediates in the wild type and *trxo1h2*.**

1015 Absolute metabolite amounts (nmol mg<sup>-1</sup> FW<sup>-1</sup>) were quantified by LC-MS/MS analysis from  
 1016 plants grown for 8 weeks in normal air (10/14 h day-/night-cycle, 390 ppm CO<sub>2</sub>) to growth stage  
 1017 5.1 (Boyes et al., 2001). At this stage, fully expanded plant-leaf's were attached to the Licor  
 1018 chamber in the second half of the illumination phase (4 to 10 h light) for controlled manipulation  
 1019 of O<sub>2</sub> and light conditions. Leaf-discs (2 cm<sup>2</sup>) were harvested under growth conditions (control,  
 1020 21% O<sub>2</sub>, 150 μE light) and after 15 min at 40% O<sub>2</sub> under 2 different light intensities (150 or 500  
 1021 μE). Shown are mean values ± SD (n = 4). Asterisks indicate significant alterations of *trxo1h2*  
 1022 compared with the wild type in each condition and rhombs to the control condition according to  
 1023 Student's *t*-test (\**p* < 0.05, #*p* < 0.05, n.s. - not significant).

1024

1025

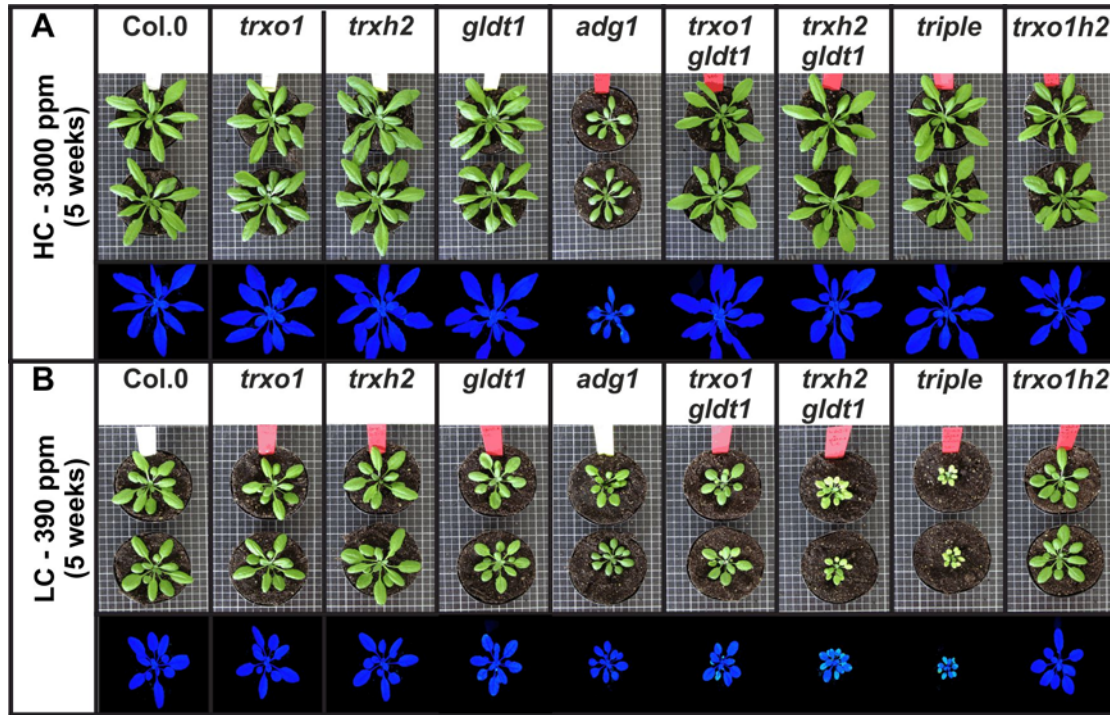

1026

1027 **Figure 5. Phenotype and chl a fluorescence images of the mutant set.**

1028 Plants were grown under environmental controlled conditions (Percivall, 10 h/14 h day-/night-  
1029 cycle) for 5 weeks in **(A)** high CO<sub>2</sub> (HC) and **(B)** low CO<sub>2</sub> (LC, normal air) conditions. At this time  
1030 point, representative photographs were taken and chl a fluorescence measurement carried out.  
1031 For quantitative data see Table 1.

1032



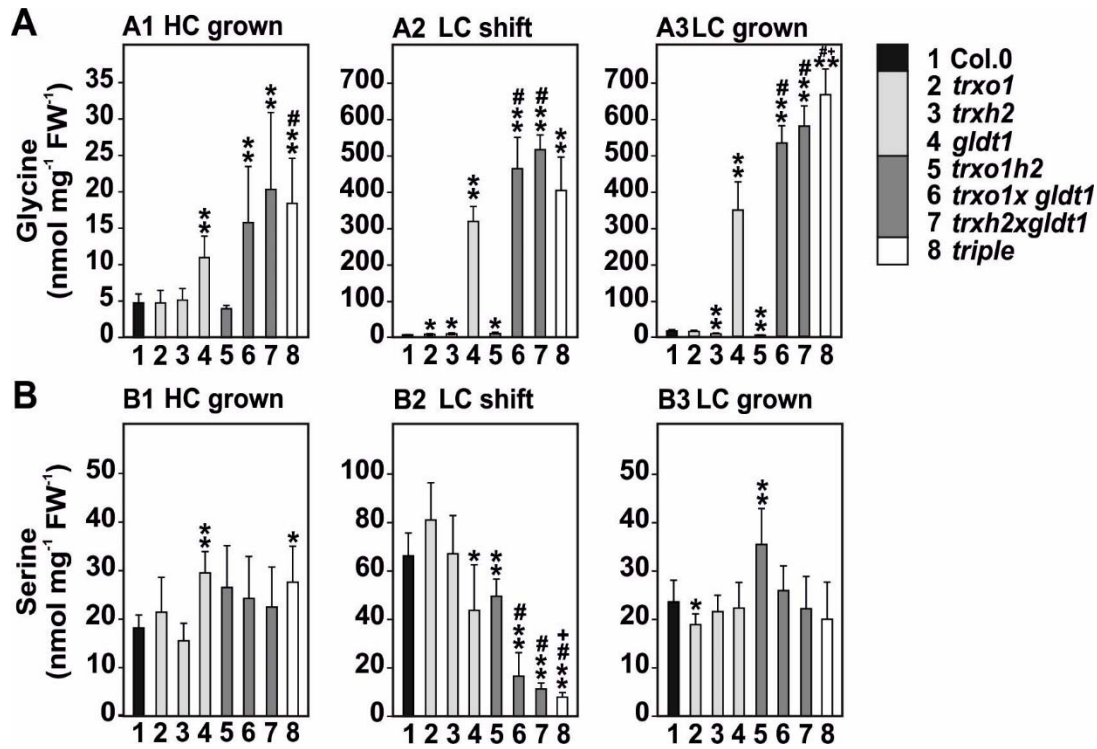

1033

1034

1035

**Figure 6. Glycine and serine in the mutant set under different conditions.**

1036 Absolute **(A)** glycine and **(B)** serine amounts ( $\text{nmol mg}^{-1} \text{FW}^{-1}$ ) were quantified by LC-MS/MS

1037 analysis. Leaf-material was harvested after 9 h of illumination from plants (A1, B1) grown for 8

1038 weeks (growth stage 5.1) under high  $\text{CO}_2$  (HC, 3000 ppm), from plants (A2, B2) shifted from HC

1039 to low  $\text{CO}_2$  (LC, 390 ppm; normal air) and (A3, B3) from plants continuously grown in LC. Shown

1040 are mean values  $\pm$  SD ( $n = 5$ ). Asterisks indicate significant alterations of the mutants compared

1041 with the wild type in each condition, rhombs of double *trxxgldt1* mutants compared with *gldt1* and

1042 plusses of the triple mutant compared to the double *trxxgldt* mutants according to Student's *t*-test

1043 ( $*p < 0.05$ ,  $**p < 0.01$ ,  $\#p < 0.05$ ,  $+p < 0.05$ ).

1044

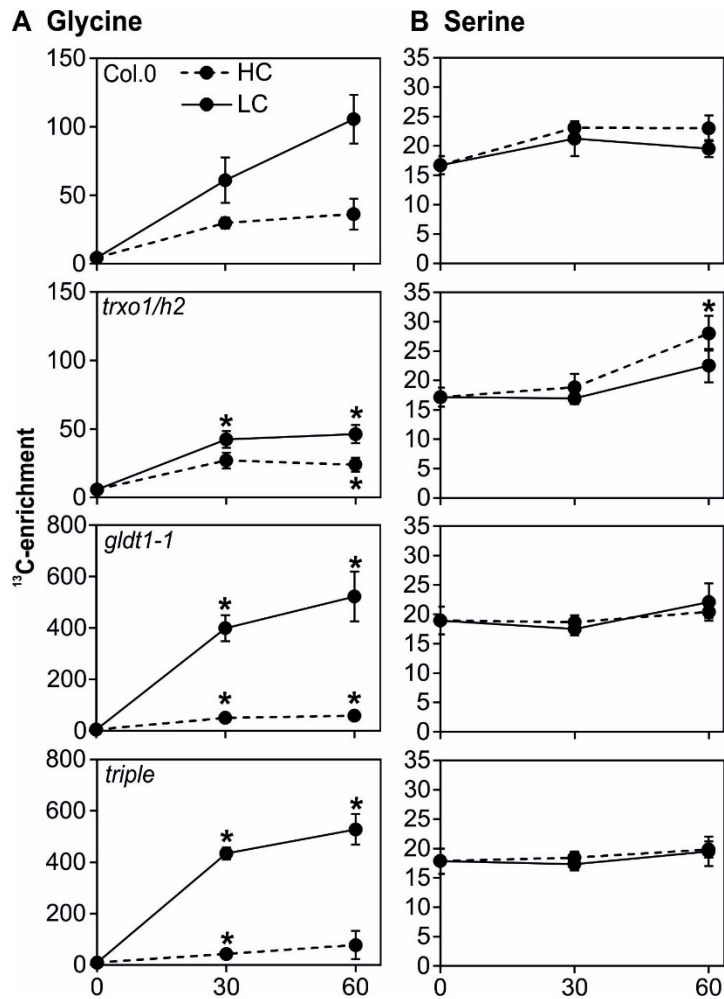

1045

1046 **Figure 7. <sup>13</sup>C-enrichment in glycine and serine in selected mutants in HC and LC.**

1047 Before onset of illumination, plant leaf's were cut from the rosettes in the dark following 5 weeks  
1048 of growth in HC conditions. Subsequently, leaf's were fed with <sup>13</sup>C-glycine through the petiole for  
1049 30 and 60 min of light in HC (dashed line) and LC (solid line) conditions. <sup>13</sup>C-enrichment in **(A)**  
1050 glycine and **(B)** serine was followed through GC-MS analysis. Shown are mean values ± SE (n >  
1051 4). Asterisks indicate significant alterations of the mutants compared with the wild type in each  
1052 condition according to Student's *t*-test (\**p* < 0.05). For further experimental details see material  
1053 and methods section.

1054

1055

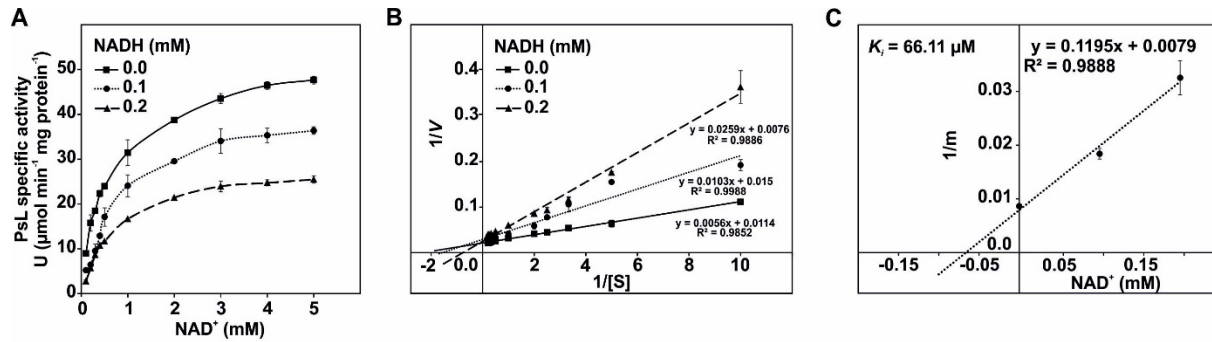

1056

1057

**Figure 8. Inhibition of *Pisum sativum* mtLPD1 (PsL) by NADH.**

1058

1059

1060

1061

1062

1063

1064

1065

1066

1067

1068

(A) The rate of PsL activity was measured in the forward direction (3 mM DL-dihydrolipoic acid) as a function of NAD<sup>+</sup> (0.1, 0.2, 0.3, 0.4, 0.5, 1, 2, 3, 4 and 5 mM) with the indicated NADH concentrations (0, 0.1 and 0.2 mM). Specific enzyme activity is expressed in  $\mu\text{mol NADH per min}^{-1} \text{mg protein}^{-1}$  at 25°C. (B) Lineweaver-Burk plots of the three NADH concentrations. (C) The inhibitor constant ( $K_i$ ) was estimated by linear regression of (1) the slopes of the three Lineweaver-Burk plots at the three NADH concentrations versus (2) the NADH concentration. Shown are mean values  $\pm$  SD from at least three technical replicates.

1069 **Supplemental data**

1070 **Tables**

1071 **Supplemental Table S1. Metabolite contents of the TCA-cycle and BCAAs in the mutant**  
 1072 **set grown under HC conditions.**

1073 Plants were grown under environmental controlled conditions in HC (3000 ppm CO<sub>2</sub>) to growth  
 1074 stage 5.1 (Boyes et al., 2001) and leaf-material was harvested at the end of the day (EoD, 9 h  
 1075 illumination). Values are means ± SD (n = 6) and bold letters indicate values statistically  
 1076 significant from the wild type based on Students *t*-test (\**p* < 0.05, \*\**p* < 0.01).

| Metabolite        | Col.0                 | <i>trxo1-1</i>            | <i>trxh2-2</i>           | <i>gldt1-1</i>         |
|-------------------|-----------------------|---------------------------|--------------------------|------------------------|
| <b>TCA-cycle</b>  |                       |                           |                          |                        |
| Pyruvate          | 11.71 ± 03.04         | 10.64 ± 03.11             | 10.59 ± 02.69            | 11.34 ± 01.48          |
| Citrate           | 3509.25 ± 775.89      | <b>1638.92 ± 354.92**</b> | 2852.11 ± 844.49         | 3801.61 ± 613.98       |
| Aconitate         | 63.48 ± 10.80         | <b>37.11 ± 06.39**</b>    | <b>34.62 ± 06.26**</b>   | 60.76 ± 07.07          |
| 2-Oxoglutarate    | 15.30 ± 03.46         | <b>08.82 ± 03.32*</b>     | 14.53 ± 03.40            | <b>09.89 ± 01.90**</b> |
| Succinate         | 07.67 ± 02.26         | <b>10.95 ± 02.43*</b>     | 9.96 ± 04.12             | 06.63 ± 01.62          |
| Fumarate          | 45.00 ± 09.53         | <b>57.60 ± 10.46*</b>     | 63.27 ± 13.05            | 42.12 ± 11.81          |
| Malate            | 15862.56 ± 2491.80    | 14883.41 ± 1789.77        | 14570.21 ± 1713.66       | 13186.09 ± 2425.34     |
| GABA              | 2.68 ± 01.25          | 02.46 ± 01.30             | 04.95 ± 01.70            | 2.59 ± 00.75           |
| <b>BCAAs</b>      |                       |                           |                          |                        |
| Valine            | 06.38 ± 00.92         | 06.09 ± 00.97             | 06.56 ± 01.13            | <b>07.71 ± 01.12*</b>  |
| Leucine           | 01.17 ± 00.23         | 01.23 ± 00.29             | 01.66 ± 00.27            | 01.18 ± 00.48          |
| Isoleucine        | 02.04 ± 00.29         | 01.96 ± 00.27             | 02.39 ± 00.41            | <b>02.74 ± 00.51*</b>  |
| <b>Metabolite</b> |                       |                           |                          |                        |
|                   | <i>trxo1/h2</i>       | <i>trxo1xgldt1</i>        | <i>trxh2xgldt1</i>       | <i>triple</i>          |
| <b>TCA-cycle</b>  |                       |                           |                          |                        |
| Pyruvate          | 12.15 ± 01.86         | <b>16.25 ± 03.87*</b>     | 14.36 ± 03.53            | <b>15.06 ± 01.16*</b>  |
| Citrate           | 3876.59 ± 731.59      | 3827.85 ± 1351.45         | <b>2170.66 ± 634.04*</b> | 2836.99 ± 781.77       |
| Aconitate         | 56.25 ± 11.31         | 69.07 ± 24.67             | 53.34 ± 14.20            | 55.24 ± 13.18          |
| 2-Oxoglutarate    | <b>10.44 ± 01.78*</b> | 17.62 ± 04.99             | 14.62 ± 02.16            | <b>09.45 ± 01.51**</b> |
| Succinate         | 07.01 ± 02.00         | <b>13.91 ± 03.63*</b>     | 11.97 ± 06.23            | 10.60 ± 02.24          |
| Fumarate          | 52.52 ± 10.66         | <b>73.87 ± 19.57*</b>     | 65.19 ± 14.36            | <b>57.01 ± 06.65*</b>  |
| Malate            | 14543.40 ± 1755.47    | 17057.54 ± 00.00          | 15144.85 ± 1697.11       | 14446.00 ± 1322.41     |
| GABA              | 1.88 ± 01.00          | 01.56 ± 00.71             | 01.53 ± 00.80            | 01.40 ± 00.27          |
| <b>BCAAs</b>      |                       |                           |                          |                        |
| Valine            | 06.46 ± 00.73         | 06.67 ± 00.94             | 06.10 ± 01.20            | 06.16 ± 00.82          |
| Leucine           | <b>01.50 ± 00.27*</b> | 01.43 ± 00.25             | 01.28 ± 00.24            | <b>01.58 ± 00.37*</b>  |
| Isoleucine        | 02.12 ± 00.39         | 02.49 ± 00.82             | 02.02 ± 00.47            | 02.16 ± 00.38          |

1077

1078

1079

1080 **Supplemental Table S2. Metabolite contents of the TCA-cycle and BCAAs in the mutant**  
 1081 **set grown under HC and shifted to LC conditions.**

1082 Plants were grown under environmental controlled conditions in HC (3000 ppm CO<sub>2</sub>) to growth  
 1083 stage 5.1 (Boyes et al., 2001) and leaf-material was harvested at the end of the day (EoD, 9 h  
 1084 illumination) following a shift to normal air (LC – 390 ppm CO<sub>2</sub>). Values are means ± SD (n = 6)  
 1085 and bold letters indicate values statistically significant from the wild type based on Students *t*-  
 1086 test (\**p* < 0.05, \*\**p* < 0.01).

| Metabolite       | Col.0              | <i>trxo1-1</i>            | <i>trxh2-2</i>            | <i>gldt1-1</i>            |
|------------------|--------------------|---------------------------|---------------------------|---------------------------|
| <b>TCA-cycle</b> |                    |                           |                           |                           |
| Pyruvate         | 14.95 ± 01.64      | 13.42 ± 02.52             | <b>11.02 ± 01.90**</b>    | <b>11.03 ± 02.11**</b>    |
| Citrate          | 2391.02 ± 319.46   | <b>3006.46 ± 221.97**</b> | <b>1314.60 ± 628.30**</b> | <b>1761.96 ± 263.84**</b> |
| Aconitate        | 54.64 ± 11.26      | 65.01 ± 08.70             | 40.77 ± 13.92             | 46.69 ± 04.70             |
| 2-Oxoglutarate   | 4.40 ± 01.83       | 3.27 ± 01.44              | 2.86 ± 00.63              | <b>76.58 ± 29.48**</b>    |
| Succinate        | 21.54 ± 05.83      | 19.01 ± 07.28             | 19.57 ± 06.72             | <b>66.08 ± 12.50**</b>    |
| Fumarate         | 69.52 ± 13.95      | 62.21 ± 12.90             | 70.98 ± 13.66             | 69.12 ± 14.18             |
| Malate           | 13910.32 ± 1227.38 | 12727.51 ± 1131.78        | 14518.79 ± 2078.32        | 13264.26 ± 2239.30        |
| GABA             | 2.51 ± 00.86       | 2.56 ± 00.65              | 2.42 ± 00.63              | 2.71 ± 00.78              |
| <b>BCAAs</b>     |                    |                           |                           |                           |
| Valine           | 4.75 ± 00.74       | 5.21 ± 00.93              | 4.87 ± 01.18              | <b>8.47 ± 02.19**</b>     |

1087

|                   |                        |                             |                             |                         |
|-------------------|------------------------|-----------------------------|-----------------------------|-------------------------|
| Leucine           | 1.02 ± 00.31           | 1.46 ± 00.78                | 1.55 ± 00.72                | 3.89 ± 01.78            |
| Isoleucine        | 1.88 ± 00.48           | 2.20 ± 00.45                | 1.87 ± 00.63                | <b>5.81 ± 01.48**</b>   |
| <b>Metabolite</b> | <b><i>trxo1h2</i></b>  | <b><i>trxo1xgldt1</i></b>   | <b><i>trxh2xgldt1</i></b>   | <b><i>triple</i></b>    |
| <b>TCA-cycle</b>  |                        |                             |                             |                         |
| Pyruvate          | <b>19.22 ± 02.34**</b> | <b>28.03 ± 04.72**</b>      | <b>22.19 ± 02.99**</b>      | <b>19.49 ± 02.08**</b>  |
| Citrate           | 2652.83 ± 495.65       | <b>4969.58 ± 1202.37**</b>  | 2596.87 ± 335.76            | 2491.56 ± 574.39        |
| Aconitate         | 51.10 ± 11.79          | <b>73.53 ± 08.55*</b>       | <b>37.06 ± 08.95*</b>       | 46.61 ± 11.84           |
| 2-Oxoglutarate    | <b>1.81 ± 00.34*</b>   | <b>121.59 ± 37.61**</b>     | <b>110.49 ± 39.12**</b>     | <b>124.43 ± 26.55**</b> |
| Succinate         | <b>12.88 ± 04.13*</b>  | <b>71.70 ± 16.44**</b>      | <b>97.19 ± 23.17**</b>      | <b>101.00 ± 31.86**</b> |
| Fumarate          | 73.10 ± 16.32          | <b>104.09 ± 26.34*</b>      | <b>102.23 ± 22.81**</b>     | <b>87.57 ± 08.86*</b>   |
| Malate            | 13998.61 ± 1519.49     | <b>18294.34 ± 3808.52**</b> | <b>17847.73 ± 3534.63**</b> | 14037.86 ± 1020.88      |
| GABA              | <b>0.91 ± 00.12**</b>  | <b>1.52 ± 00.29*</b>        | <b>0.76 ± 00.24**</b>       | <b>0.96 ± 00.25**</b>   |
| <b>BCAAs</b>      |                        |                             |                             |                         |
| Valine            | <b>3.21 ± 00.15**</b>  | 6.92 ± 03.74                | <b>8.65 ± 01.22**</b>       | <b>8.63 ± 01.82**</b>   |
| Leucine           | <b>0.69 ± 00.16**</b>  | <b>6.79 ± 02.46**</b>       | <b>6.81 ± 01.51**</b>       | <b>5.38 ± 01.75**</b>   |
| Isoleucine        | <b>1.16 ± 00.11**</b>  | <b>7.15 ± 02.27**</b>       | <b>8.89 ± 02.70**</b>       | <b>7.95 ± 02.84**</b>   |

1088

1089 **Supplemental Table S3. Metabolite contents of the TCA-cycle and BCAAs in the mutant**  
 1090 **set grown under HC conditions.**

1091 Plants were grown under environmental controlled conditions in LC (390 ppm CO<sub>2</sub>) to growth  
 1092 stage 5.1 (Boyes et al., 2001) and leaf-material was harvested at the end of the day (EoD, 9 h  
 1093 illumination). Values are means ± SD (n = 6) and bold letters indicate values statistically  
 1094 significant from the wild type based on Students *t*-test (\**p* < 0.05, \*\**p* < 0.01).

1095

| Metabolite        | Col.0                       | <i>trxo1-1</i>              | <i>trhx2-2</i>              | <i>gldt1-1</i>              |
|-------------------|-----------------------------|-----------------------------|-----------------------------|-----------------------------|
| <b>TCA-cycle</b>  |                             |                             |                             |                             |
| Pyruvate          | 16.69 ± 02.64               | 16.95 ± 02.16               | <b>26.94 ± 01.53**</b>      | <b>33.05 ± 05.59**</b>      |
| Citrate           | 1949.32 ± 680.22            | 1755.47 ± 406.63            | 1387.44 ± 445.54            | <b>4144.19 ± 415.58**</b>   |
| Aconitate         | 28.35 ± 07.11               | 28.71 ± 05.15               | <b>12.05 ± 02.69**</b>      | <b>40.10 ± 02.58*</b>       |
| 2-Oxoglutarate    | 4.68 ± 01.16                | 5.08 ± 00.98                | <b>8.00 ± 01.69**</b>       | <b>212.18 ± 49.85**</b>     |
| Succinate         | 6.38 ± 00.70                | <b>8.56 ± 02.37*</b>        | <b>18.18 ± 03.85**</b>      | <b>77.59 ± 11.76**</b>      |
| Fumarate          | 80.60 ± 07.74               | <b>67.53 ± 11.00*</b>       | <b>111.58 ± 26.24*</b>      | 95.16 ± 20.72               |
| Malate            | 8836.46 ± 1094.54           | <b>10719.37 ± 1144.81**</b> | <b>17106.38 ± 2109.96**</b> | <b>22456.49 ± 2546.32**</b> |
| GABA              | 0.65 ± 00.12                | 0.68 ± 00.22                | <b>1.49 ± 00.35**</b>       | <b>1.19 ± 00.38*</b>        |
| <b>BCAAs</b>      |                             |                             |                             |                             |
| Valine            | 2.17 ± 00.62                | <b>2.76 ± 00.34*</b>        | 1.75 ± 00.23                | 2.19 ± 00.18                |
| Leucine           | 0.44 ± 00.15                | <b>0.59 ± 00.09*</b>        | 0.37 ± 00.06                | <b>1.33 ± 00.19**</b>       |
| Isoleucine        | 0.80 ± 00.25                | <b>1.04 ± 00.15*</b>        | 0.79 ± 00.17                | <b>1.72 ± 00.25**</b>       |
| <b>Metabolite</b> |                             |                             |                             |                             |
|                   | <i>trxo1h2</i>              | <i>trxo1xgldt1</i>          | <i>trhx2xgldt1</i>          | <i>triple</i>               |
| <b>TCA-cycle</b>  |                             |                             |                             |                             |
| Pyruvate          | <b>11.54 ± 03.00**</b>      | <b>28.49 ± 03.32**</b>      | <b>23.20 ± 03.93**</b>      | <b>25.26 ± 01.89**</b>      |
| Citrate           | 2984.11 ± 905.10            | <b>4256.00 ± 984.41**</b>   | <b>4411.76 ± 896.08**</b>   | <b>5068.81 ± 209.28**</b>   |
| Aconitate         | 24.48 ± 04.42               | <b>47.08 ± 09.04**</b>      | <b>48.88 ± 07.68**</b>      | <b>50.72 ± 03.84**</b>      |
| 2-Oxoglutarate    | 5.54 ± 01.10                | <b>385.62 ± 86.18**</b>     | <b>418.48 ± 81.99**</b>     | <b>507.66 ± 46.35**</b>     |
| Succinate         | <b>27.02 ± 03.43**</b>      | <b>45.93 ± 03.80**</b>      | <b>43.76 ± 06.58**</b>      | <b>41.91 ± 05.37**</b>      |
| Fumarate          | <b>102.63 ± 18.90*</b>      | <b>52.14 ± 13.37**</b>      | <b>38.29 ± 15.69**</b>      | <b>22.97 ± 05.32**</b>      |
| Malate            | <b>17271.74 ± 1417.70**</b> | <b>22801.14 ± 3476.95**</b> | <b>25010.08 ± 4520.13**</b> | <b>26233.46 ± 2085.17**</b> |
| GABA              | 1.03 ± 00.35                | <b>1.04 ± 00.16**</b>       | <b>1.15 ± 00.20**</b>       | <b>1.32 ± 00.21**</b>       |
| <b>BCAAs</b>      |                             |                             |                             |                             |
| Valine            | 2.09 ± 00.25                | <b>3.56 ± 00.67**</b>       | <b>4.26 ± 00.56**</b>       | <b>4.78 ± 00.86**</b>       |
| Leucine           | 0.39 ± 00.11                | <b>2.17 ± 00.59**</b>       | <b>2.61 ± 00.53**</b>       | <b>2.86 ± 00.64**</b>       |
| Isoleucine        | 0.67 ± 00.10                | <b>3.37 ± 00.90**</b>       | <b>4.09 ± 00.84**</b>       | <b>4.32 ± 00.99**</b>       |

1096

1097

1098 **Supplemental Table S4. Pyridine nucleotide contents in the mutant set grown under HC**  
 1099 **conditions.**

1100 Plants were grown under environmental controlled conditions in HC (3000 ppm CO<sub>2</sub>) to growth  
 1101 stage 5.1 (Boyes et al., 2001) and leaf-material was harvested at the end of the day (EoD, 9 h  
 1102 illumination). Values are means ± SD (n = 6) and bold letters indicate values statistically  
 1103 significant from the wild type based on Students *t*-test (\**p* < 0.05, \*\**p* < 0.01).

| <b>Genotype</b>    | <b>NADH</b>  | <b>NAD<sup>+</sup></b>  | <b>NADH/NAD<sup>+</sup></b>   |
|--------------------|--------------|-------------------------|-------------------------------|
| Col.0              | 2.49 ± 0.64  | 20.96 ± 2.19            | 0.119 ± 0.008                 |
| <i>trxo1</i>       | 2.90 ± 0.39  | 20.34 ± 2.08            | 0.144 ± 0.027                 |
| <i>trxh2</i>       | 2.75 ± 0.55  | 21.39 ± 2.34            | 0.139 ± 0.031                 |
| <i>gldt1</i>       | 2.78 ± 0.49  | 20.45 ± 1.24            | 0.136 ± 0.025                 |
| <i>trxo1xgldt1</i> | 2.38 ± 0.46  | 20.98 ± 2.81            | 0.118 ± 0.020                 |
| <i>trxh2xgldt1</i> | 2.44 ± 0.48  | 19.17 ± 3.17            | 0.128 ± 0.020                 |
| <i>triple</i>      | 2.29 ± 0.26  | <b>18.03 ± 0.75*</b>    | 0.130 ± 0.017                 |
| <i>trxo1h2</i>     | 2.38 ± 0.46  | 18.08 ± 2.91            | <b>0.145 ± 0.010**</b>        |
|                    | <b>NADPH</b> | <b>NADP<sup>+</sup></b> | <b>NADPH/NADP<sup>+</sup></b> |
| Col.0              | 0.74 ± 0.22  | 14.21 ± 1.49            | 0.052 ± 0.013                 |
| <i>trxo1</i>       | 0.62 ± 0.23  | 13.15 ± 1.92            | 0.047 ± 0.016                 |
| <i>trxh2</i>       | 0.65 ± 0.19  | 11.28 ± 1.30            | 0.057 ± 0.013                 |
| <i>gldt1</i>       | 0.75 ± 0.15  | <b>11.17 ± 1.63**</b>   | 0.067 ± 0.008                 |
| <i>trxo1xgldt1</i> | 0.66 ± 0.08  | <b>11.97 ± 1.59*</b>    | 0.052 ± 0.007                 |
| <i>trxh2xgldt1</i> | 0.65 ± 0.13  | <b>10.76 ± 1.22**</b>   | 0.060 ± 0.010                 |
| <i>triple</i>      | 0.59 ± 0.15  | <b>10.26 ± 1.35**</b>   | 0.057 ± 0.015                 |
| <i>trxo1h2</i>     | 0.71 ± 0.15  | <b>9.90 ± 0.60**</b>    | 0.072 ± 0.015                 |

1104

1105

1106



1107 **Supplemental Table S5. Pyridine nucleotide contents in the mutant set shifted from HC-**  
 1108 **to-LC conditions.**

1109 Plants were grown under environmental controlled conditions in HC to growth stage 5.1 (Boyes  
 1110 et al., 2001) and shifted to LC (390 ppm CO<sub>2</sub>). Leaf-material was harvested at the end of the day  
 1111 (EoD, 9 h illumination). Values are means ± SD (n = 6) and bold letters indicate values  
 1112 statistically significant from the wild type based on Students *t*-test (\**p* < 0.05, \*\**p* < 0.01).

| <b>Genotype</b>     | <b>NADH</b>         | <b>NAD<sup>+</sup></b>  | <b>NADH/NAD<sup>+</sup></b>   |
|---------------------|---------------------|-------------------------|-------------------------------|
| Col.0               | 1.25 ± 0.37         | 15.69 ± 3.53            | 0.072 ± 0.018                 |
| <i>trxo1</i>        | 1.07 ± 0.42         | 14.40 ± 0.86            | 0.074 ± 0.029                 |
| <i>trxh2</i>        | 1.66 ± 0.25         | 16.83 ± 1.44            | <b>0.103 ± 0.012*</b>         |
| <i>gldt1</i>        | 1.65 ± 0.38         | 19.37 ± 2.93            | 0.086 ± 0.021                 |
| <i>trxo1xgldt1</i>  | <b>1.78 ± 0.22*</b> | 18.27 ± 3.68            | <b>0.114 ± 0.018*</b>         |
| <i>trxh2xgldt1</i>  | 1.57 ± 0.27         | 18.18 ± 2.28            | 0.089 ± 0.016                 |
| <i>triple</i>       | 1.72 ± 0.41         | 17.00 ± 2.28            | <b>0.112 ± 0.015*</b>         |
| <i>trxo1h2</i>      | 1.36 ± 0.14         | 14.79 ± 1.71            | <b>0.106 ± 0.016*</b>         |
|                     | <b>NADPH</b>        | <b>NADP<sup>+</sup></b> | <b>NADPH/NADP<sup>+</sup></b> |
| Col.0               | 6.39 ± 1.23         | 10.56 ± 1.48            | 0.609 ± 0.121                 |
| <i>trxo1</i>        | <b>4.88 ± 1.04*</b> | 10.68 ± 1.60            | <b>0.460 ± 0.082*</b>         |
| <i>trxh2</i>        | <b>4.54 ± 1.40*</b> | 10.58 ± 1.96            | <b>0.423 ± 0.058**</b>        |
| <i>gldt1</i>        | 7.26 ± 1.07         | 11.79 ± 0.93            | 0.617 ± 0.082                 |
| <i>trxo1x gldt1</i> | 7.57 ± 1.35         | 11.30 ± 1.78            | 0.678 ± 0.118                 |
| <i>trxh2x gldt1</i> | 7.08 ± 1.21         | 10.94 ± 1.76            | 0.650 ± 0.088                 |
| <i>triple</i>       | 6.46 ± 1.09         | 9.70 ± 1.78             | 0.697 ± 0.096                 |
| <i>trxo1h2</i>      | <b>5.00 ± 0.83*</b> | <b>7.66 ± 0.70**</b>    | 0.656 ± 0.112                 |

1113

1114

1115 **Supplemental Table S6. Pyridine nucleotide contents in the mutant set under LC**  
 1116 **conditions.**

1117 Plants were grown under environmental controlled conditions in LC (390 ppm CO<sub>2</sub>) to growth  
 1118 stage 5.1 (Boyes et al., 2001) and leaf-material was harvested at the end of the day (EoD, 9 h  
 1119 illumination). Values are means ± SD (n = 6) and bold letters indicate values statistically  
 1120 significant from the wild type based on Students *t*-test (\**p* < 0.05, \*\**p* < 0.01).

| <b>Genotype</b>     | <b>NADH</b>          | <b>NAD<sup>+</sup></b>  | <b>NADH/NAD<sup>+</sup></b>   |
|---------------------|----------------------|-------------------------|-------------------------------|
| Col.0               | 3.31 ± 0.84          | 24.41 ± 4.27            | 0.136 ± 0.017                 |
| <i>trxo1</i>        | 2.45 ± 0.71          | 22.36 ± 3.90            | 0.108 ± 0.024                 |
| <i>trxh2</i>        | 3.10 ± 0.67          | 27.99 ± 7.29            | 0.116 ± 0.039                 |
| <i>gldt1</i>        | 3.22 ± 0.78          | 28.01 ± 3.48            | 0.108 ± 0.011                 |
| <i>trxo1xgldt1</i>  | 3.23 ± 0.52          | 30.95 ± 4.68            | <b>0.099 ± 0.001**</b>        |
| <i>trxh2xgldt1</i>  | 2.97 ± 0.23          | 30.54 ± 2.48            | <b>0.102 ± 0.010**</b>        |
| <i>triple</i>       | 2.89 ± 0.66          | 31.23 ± 2.79            | <b>0.096 ± 0.015*</b>         |
| <i>trxo1h2</i>      | 2.66 ± 0.25          | 25.97 ± 1.59            | <b>0.108 ± 0.017*</b>         |
|                     | <b>NADPH</b>         | <b>NADP<sup>+</sup></b> | <b>NADPH/NADP<sup>+</sup></b> |
| Col.0               | 0.96 ± 0.18          | 16.40 ± 3.59            | 0.077 ± 0.011                 |
| <i>trxo1</i>        | 0.80 ± 0.24          | <b>9.73 ± 1.25**</b>    | 0.081 ± 0.018                 |
| <i>trxh2</i>        | 0.93 ± 0.24          | 11.72 ± 1.82            | 0.080 ± 0.023                 |
| <i>gldt1</i>        | 1.15 ± 0.30          | <b>11.33 ± 1.03*</b>    | <b>0.101 ± 0.018*</b>         |
| <i>trxo1x gldt1</i> | <b>1.62 ± 0.14**</b> | 15.26 ± 1.51            | <b>0.109 ± 0.015**</b>        |
| <i>trxh2x gldt1</i> | <b>1.41 ± 0.07**</b> | <b>11.83 ± 1.13*</b>    | <b>0.129 ± 0.011**</b>        |
| <i>triple</i>       | <b>1.39 ± 0.21*</b>  | 15.05 ± 3.12            | <b>0.104 ± 0.016*</b>         |
| <i>trxo1h2</i>      | 0.94 ± 0.10          | <b>9.51 ± 1.20**</b>    | <b>0.100 ± 0.017*</b>         |

1121

1122 **Figures**

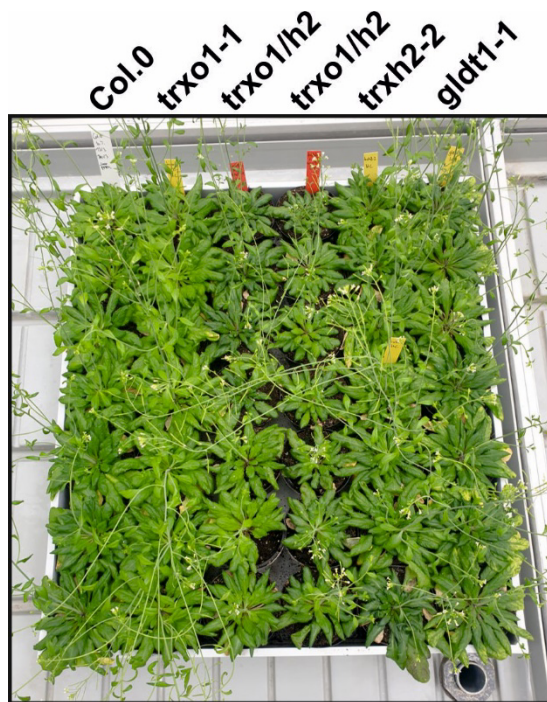

1123

1124

1125 **Supplemental Figure S1. Visual phenotype of *trxo1h2* shifted from HC-to-LC conditions.**

1126 Plants were grown under standard growth conditions (10/14 h day-/night-cycle) in high CO<sub>2</sub> (HC,  
1127 3000 ppm CO<sub>2</sub>). After reaching growth stage 5.1 (Boyes et al., 2001) plants were transferred to  
1128 normal air (LC, 390 ppm CO<sub>2</sub>) and growth continued under long day conditions (16/8 h day-  
1129 /night-cycle) to stimulate flowering and seed production. The picture shown was taken following  
1130 2 weeks after the transfer and indicates a severe growth reduction of the *trxo1h2* double mutant  
1131 under these conditions.

1132

1133

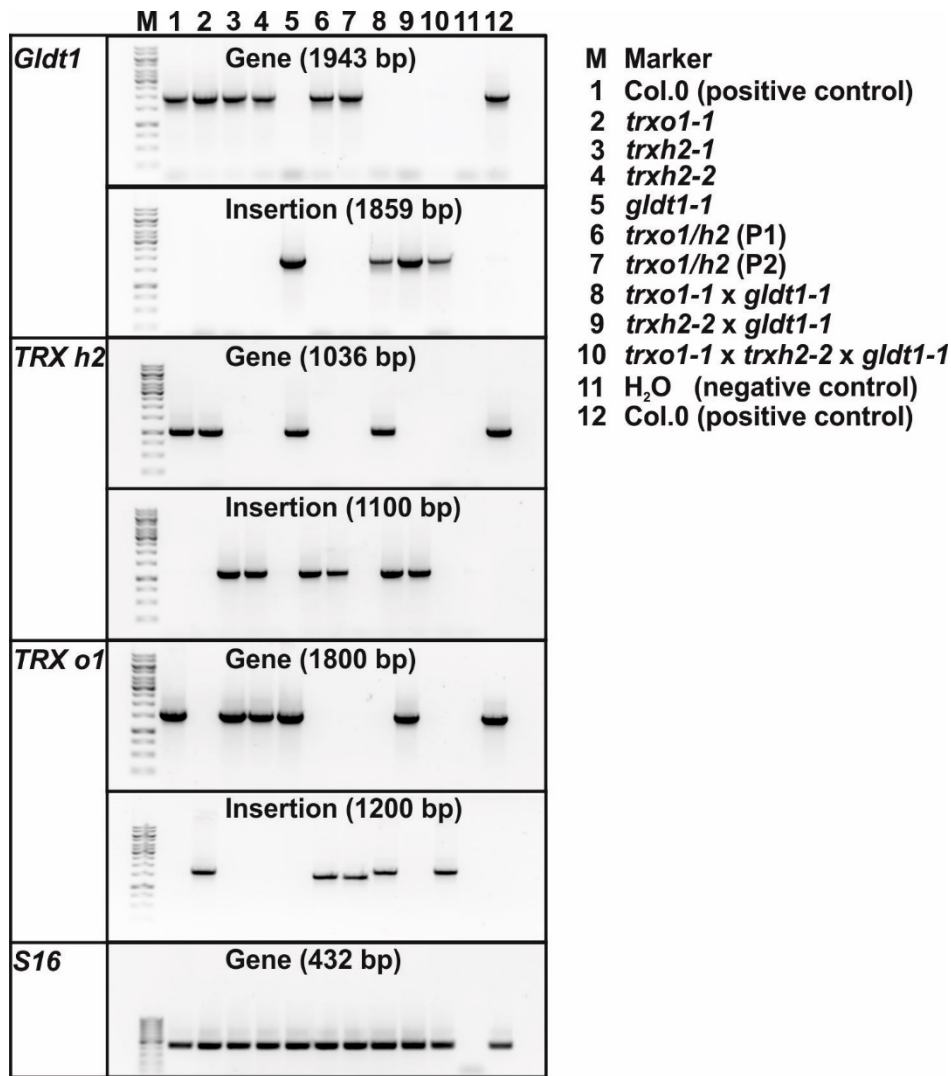

1134

1135 **Supplemental Figure S2. Genotype of multiple *TRX/GLDT* mutants.**

1136 PCR verification of diagnostic fragments for the *GLDT1*, *TRX h2* and *TRX o1* genes and  
1137 insertions within the respective genes. The *S16* gene was amplified as positive control to verify  
1138 DNA-integrity.

1139

1140

1141
